# Supplementary material for: Characterization of a Novel Species of Legionella Isolated from a Healthcare Facility: Legionella resiliens sp. nov
Source: MDPI journal article supplement (doi:10.3390/pathogens13030250), 2024-03-14
Supplement: s1 [file s1]

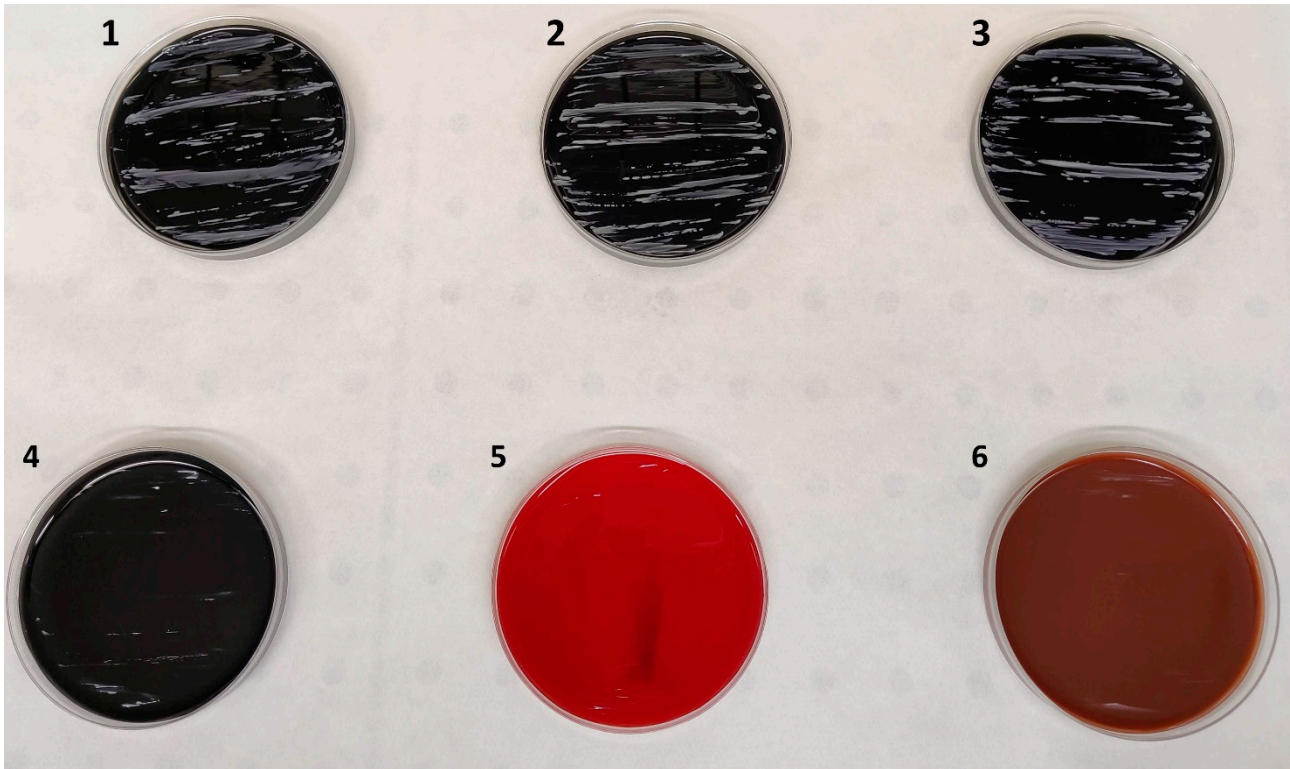

**Figure S1.** The strain 8cVS16<sup>T</sup> and 9fVS26 growth evaluation on different media: (1) GVPC, (2) MWY, (3) BCYE Cys+ and (4) Cys-, (5) TSA Blood Agar and (6) Chocolate Enriched Agar.

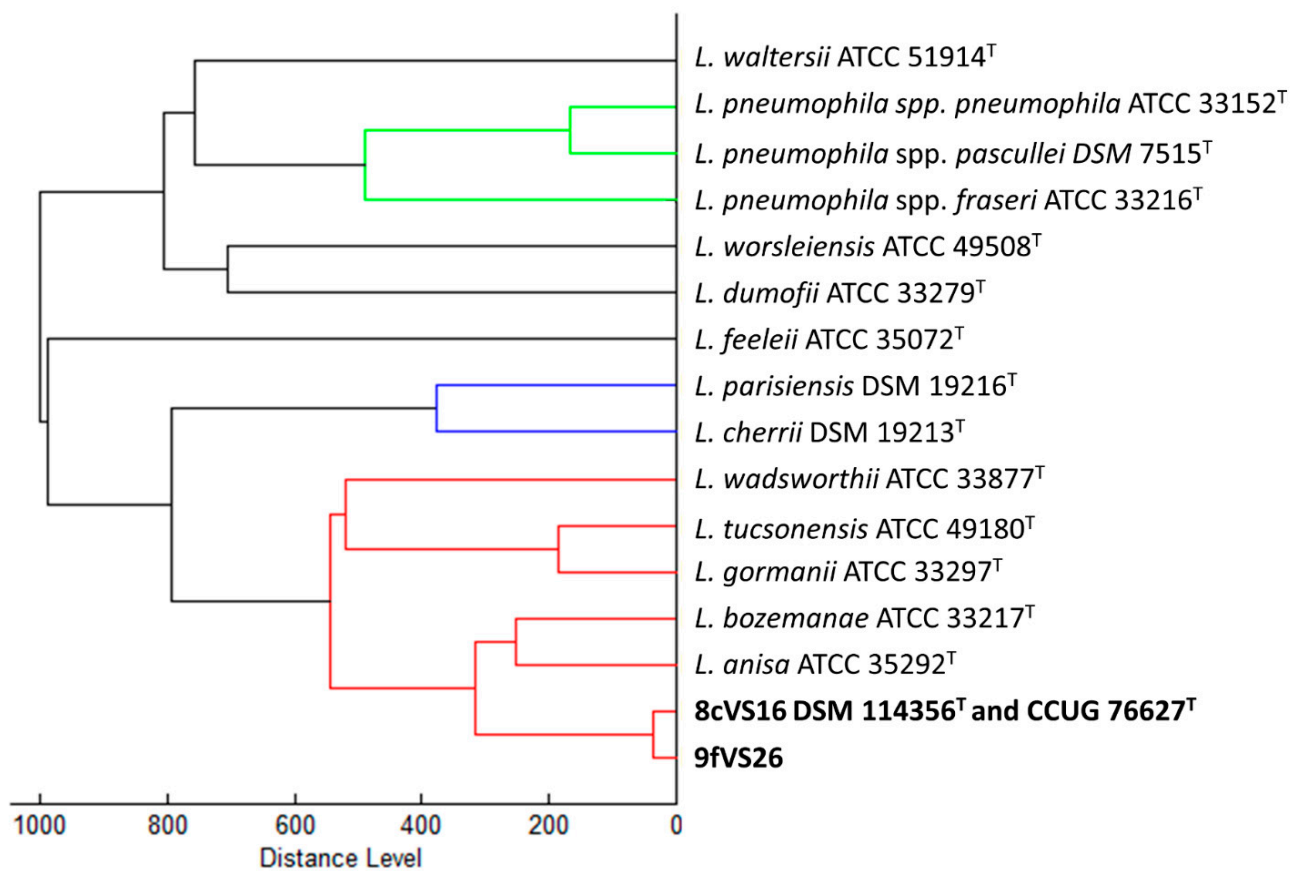

**Figure S2.** Dendrogram based on whole-cell MALDI-TOF mass spectra for the strains 8cVS16<sup>T</sup> and 9fVS26 and *Legionella* reference strains present in instrument database.

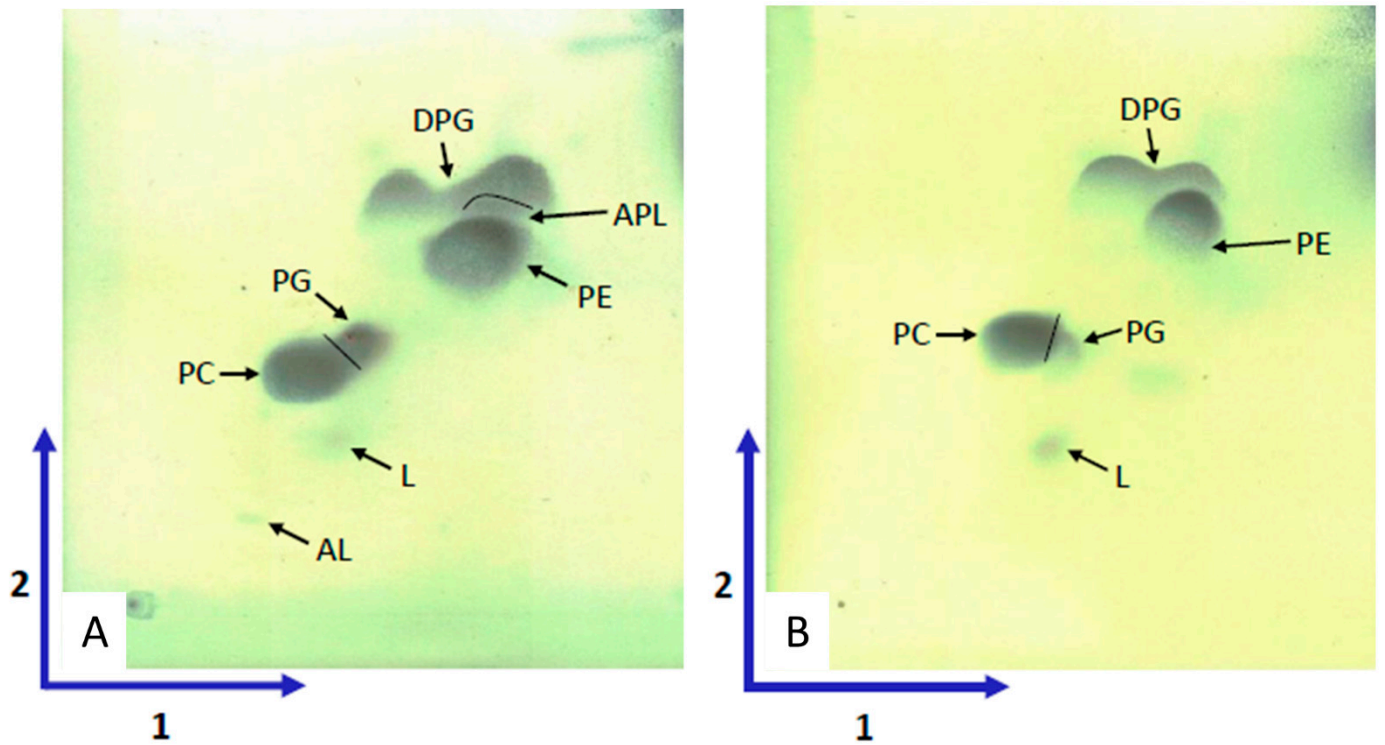

**Figure S3.** Lipids contents of 8cVS16<sup>T</sup> and 9fVS26 (A), and *L. anisa* (DSM 17627<sup>T</sup>) (B).

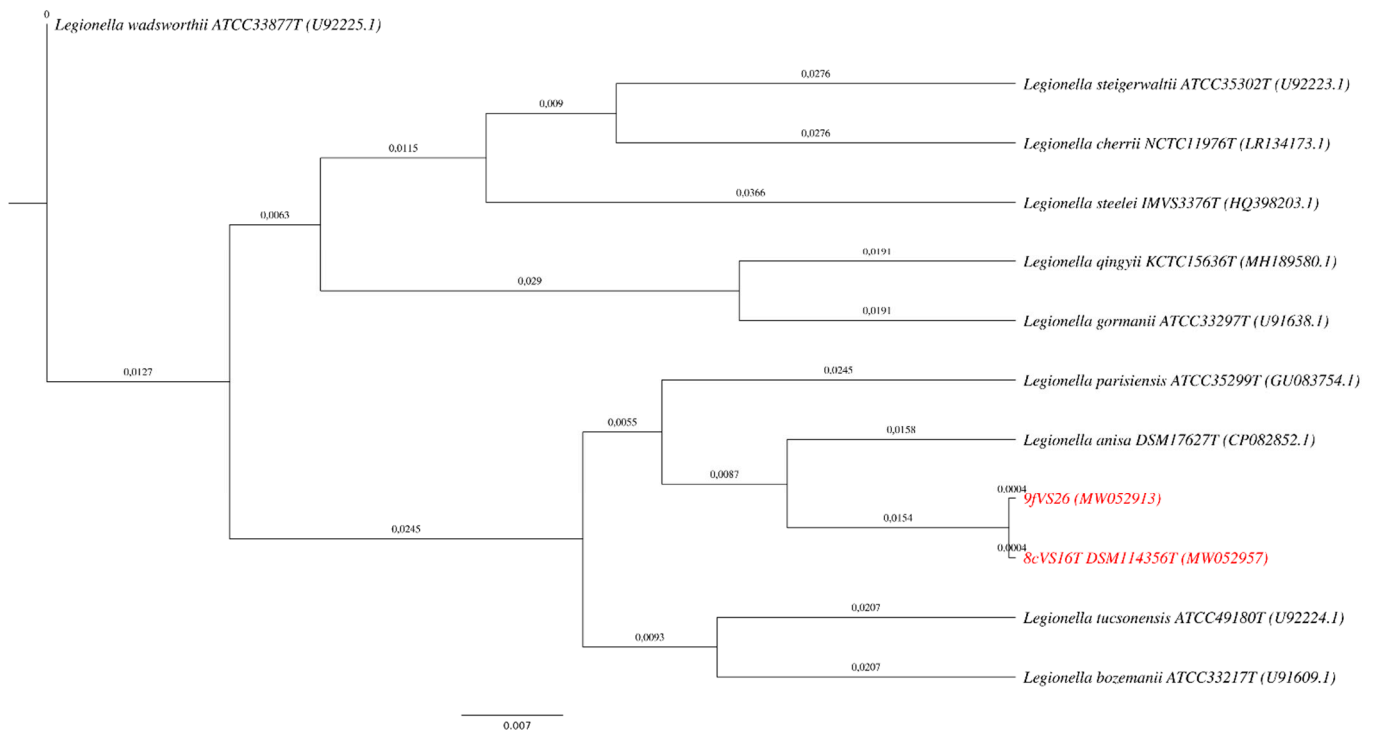

**Figure S4.** Phylogenetic tree based on *mip* gene of the two strains (8cVS16<sup>T</sup> and 9fVS26) and closely related species of the genus *Legionella*. Branch labels show substitutions per site calculated by Bayesian inference using the Markov Chain Monte Carlo (MCMC) method [39,40]. Bar 0.007 substitution per nucleotide position. The strains 8cVS16<sup>T</sup> and 9fVS26 are highlighted in red.

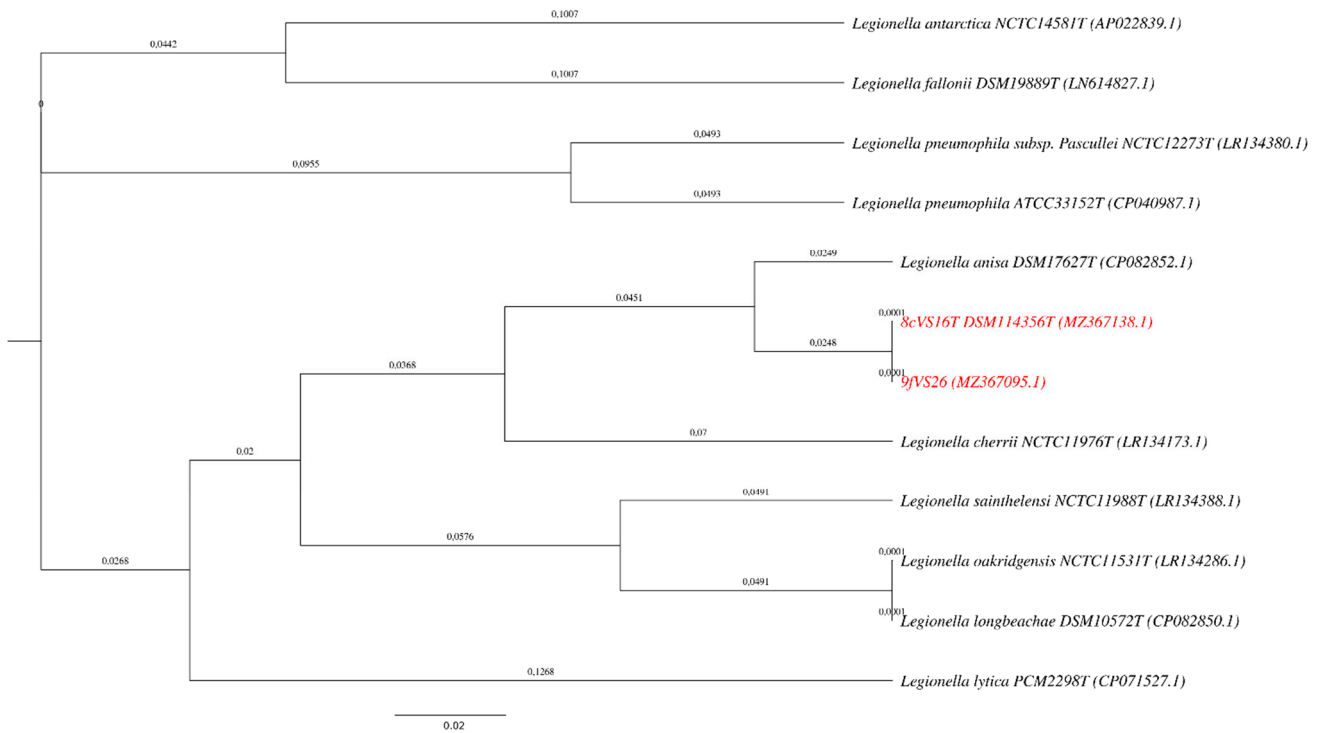

**Figure S5.** Phylogenetic tree based on *rpoB* gene of the two strains (8cVS16<sup>T</sup> and 9fVS26) and closely related species of the genus *Legionella*. Branch labels show substitutions per site calculated by Bayesian inference using the Markov Chain Monte Carlo (MCMC) method [39,40]. Bar 0.02 substitution per nucleotide position. The strain 8cVS16<sup>T</sup> and 9fVS26 are highlighted in red.

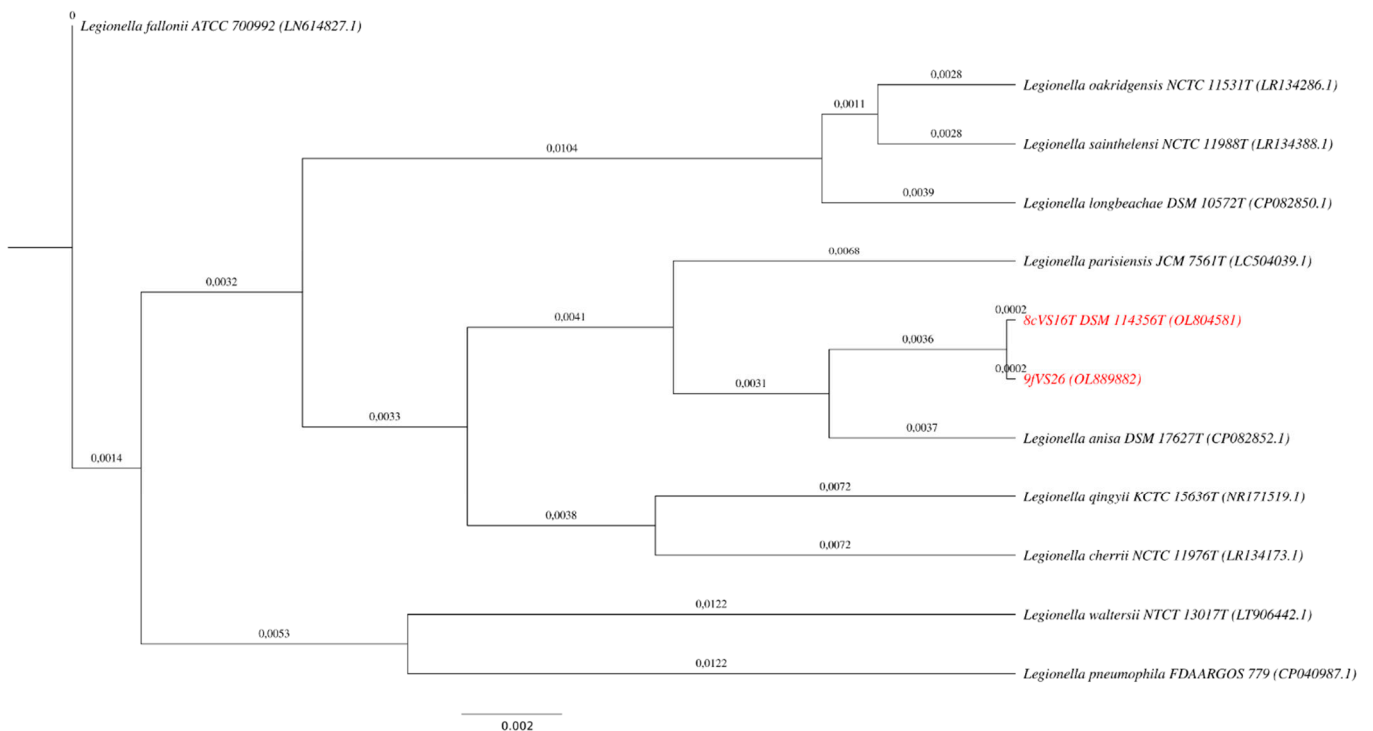

**Figure S6.** Phylogenetic tree based on 16S rRNA gene of the two strains (8cVS16<sup>T</sup> and 9fVS26) and closely related species of the genus *Legionella*. Branch labels show substitutions per site calculated by Bayesian inference using the Markov Chain Monte Carlo (MCMC) method [39,40]. Bar 0.002 substitution per nucleotide position. The strain 8cVS16<sup>T</sup> and 9fVS26 are highlighted in red.

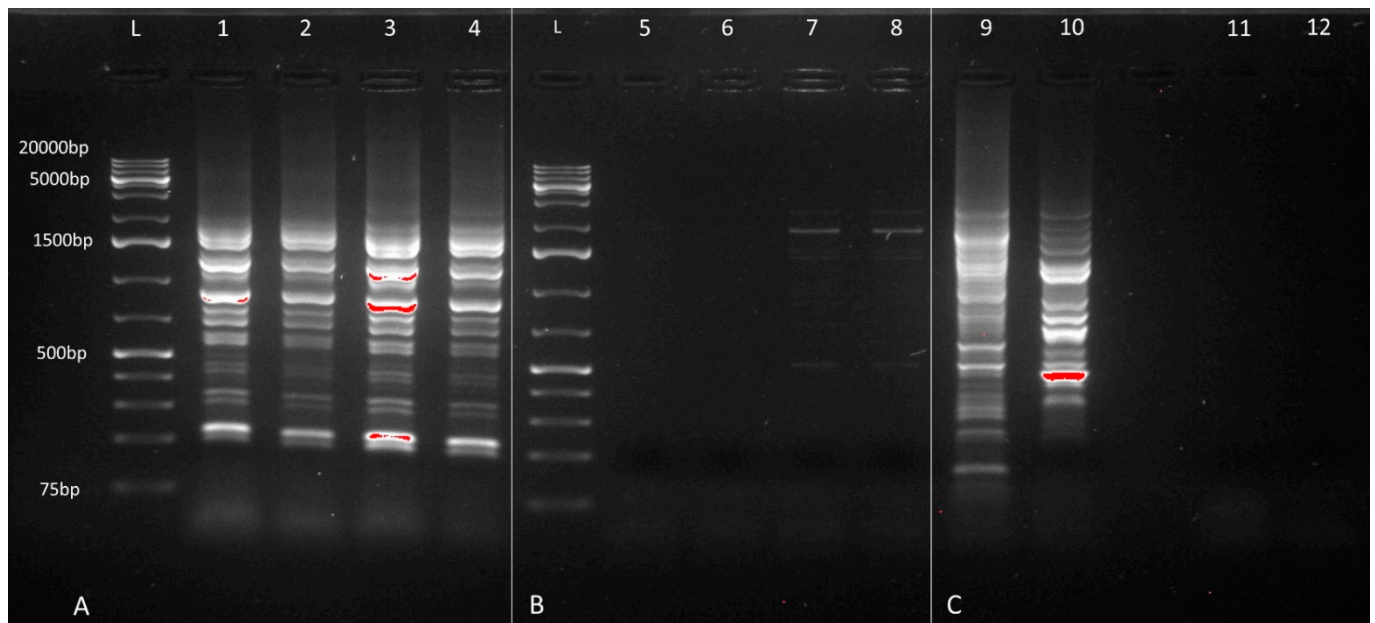

**Figure S7.** REP-PCR DNA and BOX PCR fingerprinting products for the strains 8cVS16<sup>T</sup> (1) and 9fVS26 (2) visualized by electrophoresis gel 2% w/v, to assess the isolates clonality. The gel represents: section **A**, the gene products of both strain amplified by REP primers: lane 1 for 8cVS16<sup>T</sup> and 2 for 9fVS26 at DNA concentration of 70 ng; lane 3 for 8cVS16<sup>T</sup> and 4 for 9fVS26 as DNA "undiluted"; section **B**, the gene product obtained by BOX primer amplification: lines 5 and 6 for 8cVS16<sup>T</sup> and 9fVS26, respectively at a DNA concentration of 70 ng; lines 7 and 8 for 8cVS16<sup>T</sup> and 9fVS26 as DNA "undiluted"; section **C**, lane 9 positive (C+) control for REP-PCR, lane 10 positive (C+) control for BOX-PCR, lane 11 negative (C-) control for REP-PCR and lane 12 negative (C-) control for BOX-PCR. Lane "L": reference marker sizes in base pairs (1kb).



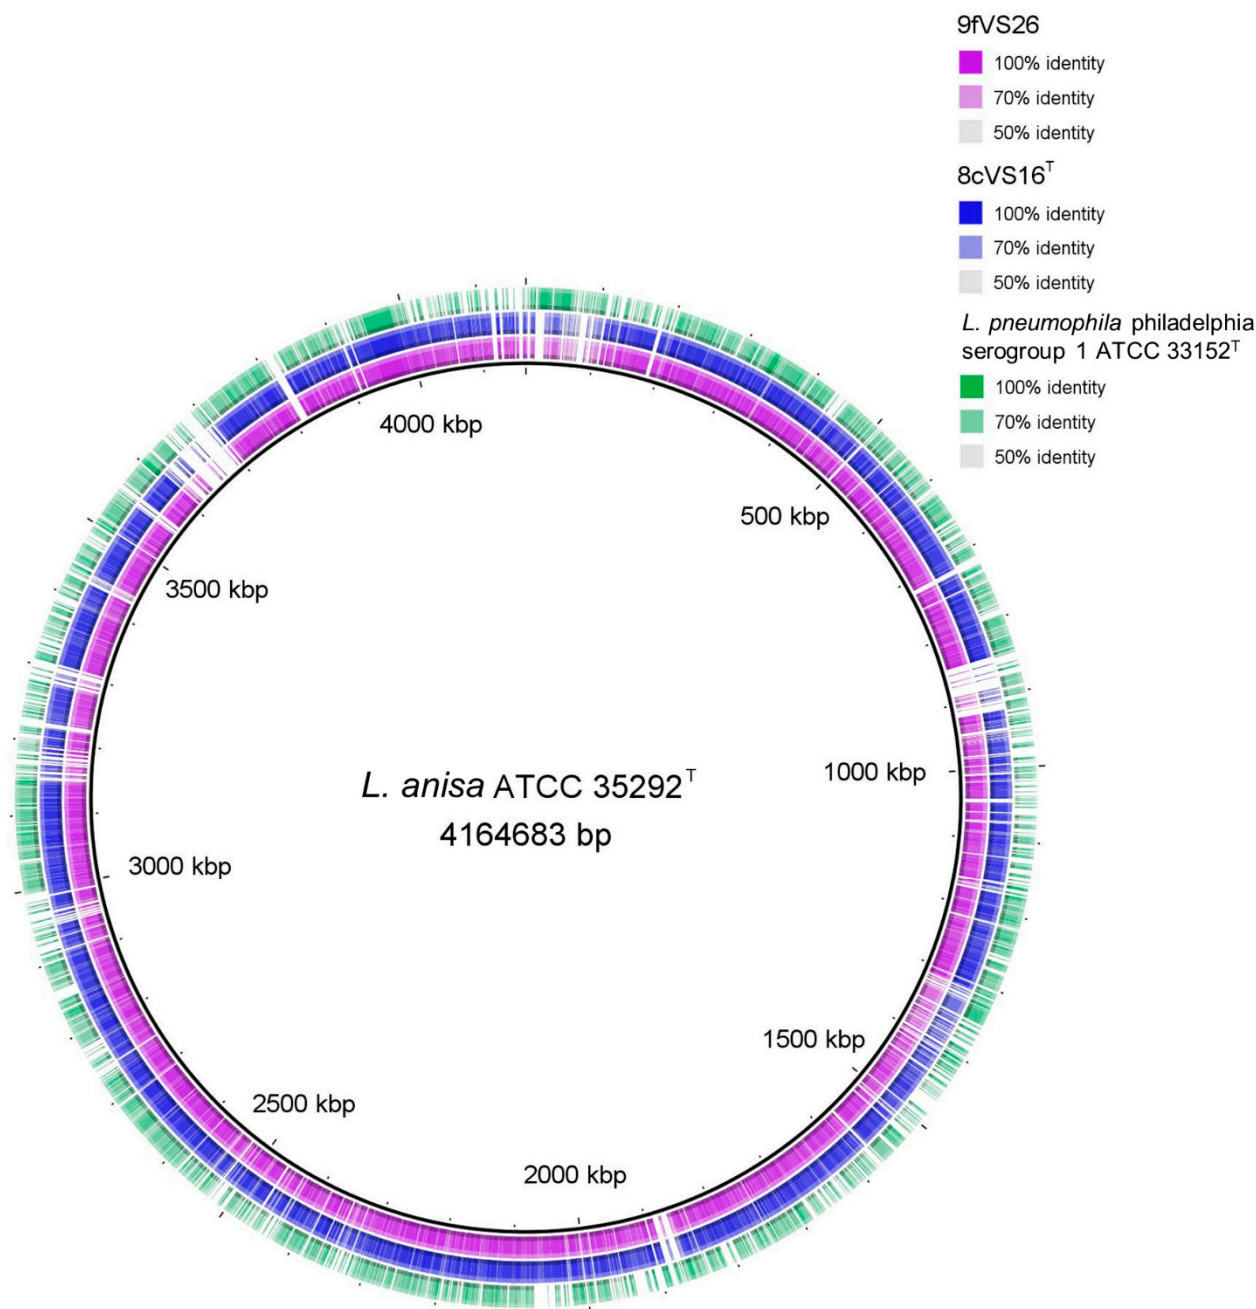

**Figure S8.** Genome's alignment of *L. anisa* (ATCC 35292<sup>T</sup>), 8cVS16<sup>T</sup>, 9fVS26 and *Lp1* (ATCC 33152<sup>T</sup>), provided by BLAST Ring Image Generator (v. 0.95) software.

**Table S1.** List of 63 *Legionella* species, plus 8cVS16<sup>T</sup> and 9fVS26, utilized for the genome data comparison.

| Genome Name                       | Strain         | Culture Collection | Assembly Accession | GenBank Accessions |
|-----------------------------------|----------------|--------------------|--------------------|--------------------|
| 8cVS16                            | 8cVS16         | DSM:114356         | GCA_021344005.1    | JAJTND000000000.1  |
| 9fVS26                            | 9fVS26         |                    | GCA_022182285.1    | JAJSPM000000000.1  |
| <i>Fluoribacter dumoffii</i>      | NY 23          | ATCC:33279         | GCA_900450695.1    | UGGT000000000.1    |
| <i>Fluoribacter gormanii</i>      | LS-13          | ATCC:33297         | GCA_001467685.1    | LNVD000000000.1    |
| <i>Legionella adelaidensis</i>    | 1762-AUS-E     | ATCC:49625         | GCA_001467055.1    | LNKA000000000.1    |
| <i>Legionella anisa</i>           | WA-316-C3      | ATCC:35292         | GCA_900639785.1    | CAAAHR000000000.1  |
| <i>Legionella antarctica</i>      | TUM19329       | NCTC:14581         | GCA_011764505.1    | AP022839.1         |
| <i>Legionella beliardensis</i>    | Montbéliard A1 | ATCC:700512        | GCA_900452395.1    | UGNV000000000.1    |
| <i>Legionella birminghamensis</i> | 1407-AL-H      | ATCC:43702         | GCA_900452515.1    | UGNW000000000.1    |
| <i>Legionella bononiensis</i>     | 30cS62         | ATCC:TSD-262       | GCA_016786415.1    | JADWVN000000000.1  |

|                                   |                   |               |                 |                   |
|-----------------------------------|-------------------|---------------|-----------------|-------------------|
| <i>Legionella bozemanæ</i>        | WIGA              | ATCC:33217    | GCA_900640135.1 | CAAAY000000000.1  |
| <i>Legionella brunensis</i>       | 441-1             | ATCC:43878    | GCA_001467025.1 | LNXXV00000000.1   |
| <i>Legionella busanensis</i>      | K9951             | ATCC:BAA-518  | GCA_900461525.1 | UGOD00000000.1    |
| <i>Legionella cardiaca</i>        | H63               | ATCC:BAA-2315 | GCA_029026145.1 | CP119078.1        |
| <i>Legionella cherrii</i>         | ORW               | ATCC:35252    | GCA_000621385.1 | JHYM00000000.1    |
| <i>Legionella cinclinatiensis</i> | 72-OH-0           | ATCC:43753    | GCA_001467545.1 | LNXX00000000.1    |
| <i>Legionella drancourtii</i>     | LLAP12            | ATCC:50991    | GCA_000162755.2 | ACUL00000000.2    |
| <i>Legionella drozanskii</i>      | LLAP-1            | ATCC:700990   | GCA_900640075.1 | CAAAIU000000000.1 |
| <i>Legionella erythra</i>         | SE-32A-C8         | ATCC:35303    | GCA_001467615.1 | LNIA00000000.1    |
| <i>Legionella fairfieldensis</i>  | 1725-AUS-E        | ATCC:49588    | GCA_900640125.1 | CAAAIZ000000000.1 |
| <i>Legionella fallonii</i>        | LLAP-10           | ATCC:700992   | GCA_000953135.1 | LN614827.1        |
| <i>Legionella feeleyi</i>         | WO-44C            | ATCC:35072    | GCA_001467625.1 | LNBY00000000.1    |
| <i>Legionella geestiana</i>       | 1308              | ATCC:49504    | GCA_001467645.1 | LNVC00000000.1    |
| <i>Legionella gratiana</i>        | Lyon 8420412      | ATCC:49413    | GCA_001467695.1 | LNIE00000000.1    |
| <i>Legionella gresilensis</i>     | Gréoux 11 D13     | ATCC:700509   | GCA_900639865.1 | CAAAHX000000000.1 |
| <i>Legionella hackeliae</i>       | Lansing 2         | ATCC:35250    | GCA_000953655.1 | LN681225.1        |
| <i>Legionella impletisoli</i>     | OA1-1             | DSM:18493     | GCA_900639875.1 | CAAAIA000000000.1 |
| <i>Legionella israelensis</i>     | Bercovier 4       | ATCC:43119    | GCA_004571175.1 | CP038273.1        |
| <i>Legionella jamestowniensis</i> | JA-26-G1-E2       | DSM:19215     | GCA_900114725.1 | FOTZ00000000.1    |
| <i>Legionella jordanis</i>        | BL-540            | NCTC:11533    | GCA_900637635.1 | LR134383.1        |
| <i>Legionella lansingensis</i>    | 1677-MI-H         | NCTC:12830    | GCA_900187355.1 | LT906451.1        |
| <i>Legionella londiniensis</i>    | 1477              | ATCC:49505    | GCA_900452755.1 | UGON00000000.1    |
| <i>Legionella longbeachae</i>     | Long Beach 4      | ATCC:33462    | GCA_004283175.1 | RXNW00000000.1    |
| <i>Legionella lytica</i>          | L2                | PMC:2298      | GCA_023921225.1 | CP071527.1        |
| <i>Legionella maceachernii</i>    | PX-1-G2-E2        | ATCC:35300    | GCA_900460175.1 | UHI000000000.1    |
| <i>Legionella maioricensis</i>    | HCPI-6            | CCUG:75071    | GCA_023618015.1 | JAJKBJ000000000.1 |
| <i>Legionella massiliensis</i>    | LegA              | DSM:24804     | GCA_000756815.1 | CCVW00000000.1    |
| <i>Legionella moravica</i>        | 316-86            | ATCC:43877    | GCA_900452715.1 | UGOG00000000.1    |
| <i>Legionella nagasakiensis</i>   | CDC-1796-JAP-E    | ATCC:BAA-1557 | GCA_900639915.1 | CAAAID000000000.1 |
| <i>Legionella nautarum</i>        | 1224              | ATCC:49506    | GCA_001467895.1 | LNIO00000000.1    |
| <i>Legionella norrlandica</i>     | LEGN              | ATCC:BAA-2678 | GCA_000770585.1 | JNCF00000000.1    |
| <i>Legionella oakridgensis</i>    | Oak Ridge 10      | ATCC:33761    | GCA_001648605.1 | LCUA00000000.1    |
| <i>Legionella parisiensis</i>     | PF-209C-C2        | ATCC:35299    | GCA_900461585.1 | UGOH00000000.1    |
| <i>Legionella pneumophila</i>     | Philadelphia-1    | ATCC:33152    | GCA_001941585.1 | CP013742.1        |
| <i>Legionella qingyii</i>         | km488             | KCTC:15636    | GCA_003184185.1 | QHJG01000001.1    |
| <i>Legionella quateirensis</i>    | 1335              | ATCC:49507    | GCA_900452695.1 | UGOW00000000.1    |
| <i>Legionella quinlivanii</i>     | 1442-AUS-E        | ATCC:43830    | GCA_001467975.1 | LNYS00000000.1    |
| <i>Legionella rowbothamii</i>     | LLAP6             | ATCC:700991   | GCA_900639985.1 | CAAAIM000000000.1 |
| <i>Legionella rubrilucens</i>     | WA-270A-C2        | ATCC:35304    | GCA_001468125.1 | LNIT00000000.1    |
| <i>Legionella sainthelensi</i>    | MSH-4             | ATCC:35248    | GCA_001468105.1 | LNIV00000000.1    |
| <i>Legionella santacrucis</i>     | SC-63-C7          | ATCC:35301    | GCA_001468135.1 | LNIV00000000.1    |
| <i>Legionella saoudiensis</i>     | LS-1              | DSM:101682    | GCA_001465875.1 | CZVG00000000.1    |
| <i>Legionella septentrionalis</i> | km711             | KCTC:15655    | GCA_003989745.1 | RZGS00000000.1    |
| <i>Legionella shakespearei</i>    | 214               | ATCC:49655    | GCA_001468025.1 | LNIVW00000000.1   |
| <i>Legionella spiritensis</i>     | ML76              | NCTC:12082    | GCA_900637495.1 | LR134374.1        |
| <i>Legionella steeleyi</i>        | IMVS-3376         | ATCC:BAA-2169 | GCA_001468005.1 | LNIVY00000000.1   |
| <i>Legionella steigerwaltii</i>   | SC-18-C9          | ATCC:35302    | GCA_900452835.1 | UGOY00000000.1    |
| <i>Legionella taurinensis</i>     | Turin I no 1      | ATCC:700508   | GCA_900452865.1 | UGOZ00000000.1    |
| <i>Legionella tucsonensis</i>     | 1087-AZ-H         | ATCC:49180    | GCA_900640035.1 | CAAAIP000000000.1 |
| <i>Legionella tunisiensis</i>     | LegM              | DSM:24805     | GCA_000308315.1 | CALJ00000000.1    |
| <i>Legionella wadsworthii</i>     | Wadsworth 81-716A | ATCC:33877    | GCA_900452925.1 | UGPB00000000.1    |
| <i>Legionella waltersii</i>       | 2074-AUS-E        | ATCC:51914    | GCA_900187095.1 | LT906442.1        |
| <i>Legionella worsleiensis</i>    | 1347              | ATCC:49508    | GCA_900453045.1 | UGPA00000000.1    |
| <i>Legionella yabuuchiæ</i>       | OA1-2             | DSM:18492     | GCA_900640115.1 | CAAAIW000000000.1 |
| <i>Tatlockia micdadei</i>         | TATLOCK           | ATCC:33218    | GCA_000953635.1 | LN614830.1        |

**Table S2.** Cellular fatty acid (CFA) composition of 8cVS16<sup>T</sup>, 9fVS26 and *Legionella* most related species: *L. anisa* (DSM 17627<sup>T</sup>), *L. bozeman* (ATCC 33217<sup>T</sup>), *L. parisiensis* ATCC 35299<sup>T</sup>), *L. tucsonensis* (ATCC 40180<sup>T</sup>), *L. wadsworthii* (ATCC 33877<sup>T</sup>) and *L. pneumophila* subsp. *pneumophila* Philadelphia 1 (ATCC 33152<sup>T</sup>). (-), not detected; NA, not available; Tr, traces. The values indicate the percentages of total fatty acids found.

| Fatty acid                                             | 8cVS16 <sup>T</sup><br>and 9fVS26 | <i>L. anisa</i> | <i>L. bozeman</i> <sup>a</sup> | <i>L. parisiensis</i> <sup>a</sup> | <i>L. tucsonensis</i> <sup>b</sup> | <i>L. wadsworthii</i> <sup>a</sup> | <i>L. pneumophila</i> <sup>c</sup> |
|--------------------------------------------------------|-----------------------------------|-----------------|--------------------------------|------------------------------------|------------------------------------|------------------------------------|------------------------------------|
| <b>Saturated</b>                                       |                                   |                 |                                |                                    |                                    |                                    |                                    |
| C <sub>14:0</sub>                                      | 1.5                               | 0.4             |                                |                                    |                                    |                                    | -                                  |
| C <sub>15:0</sub>                                      | 3.1                               | 1.8             |                                |                                    |                                    |                                    | Tr                                 |
| C <sub>16:0</sub>                                      | 16.3                              | 11.5            | 11.0                           | 9.0                                | 10.0                               | 6.0                                | 12.0                               |
| C <sub>16:1</sub>                                      |                                   |                 |                                |                                    | 20.0                               |                                    |                                    |
| C <sub>17:0</sub>                                      | 1.1                               | 2.0             |                                |                                    | 1.0                                |                                    | 1.0                                |
| C <sub>18:0</sub>                                      | 0.8                               | 1.5             | 2.0                            | 1.0                                | 1.0                                | 1.0                                | 3.0                                |
| C <sub>19:0</sub>                                      | 0.3                               | 0.3             | 1.0                            |                                    |                                    |                                    |                                    |
| C <sub>20:0</sub>                                      | 2.1                               | 0.5             | 1.0                            |                                    |                                    |                                    | 2.0                                |
| <b>Unsaturated</b>                                     |                                   |                 |                                |                                    |                                    |                                    |                                    |
| C <sub>14:1</sub> ω5c                                  | 1.0                               | 0.3             |                                |                                    |                                    |                                    | Tr                                 |
| C <sub>15:1</sub> ω6c                                  | 3.4                               | 2.1             |                                |                                    |                                    |                                    | 1.5                                |
| C <sub>16:1</sub> ω7c                                  | 0.5                               |                 | 9.0                            |                                    |                                    | 8.0                                | 29.6                               |
| C <sub>16:1</sub> ω11c                                 | 1.0                               |                 |                                | 7.0                                |                                    |                                    |                                    |
| <b>Cyclopropane</b>                                    |                                   |                 |                                |                                    |                                    |                                    |                                    |
| C <sub>16:0</sub> cyclo                                |                                   |                 |                                |                                    | 1.0                                |                                    |                                    |
| C <sub>17:0</sub> cyclo                                | 0.4                               | 0.8             | 9.0                            | 16.0                               | 7.0                                | 6.0                                | -                                  |
| <b>Methyl branched (iso, anteiso)</b>                  |                                   |                 |                                |                                    |                                    |                                    |                                    |
| C <sub>15:0</sub> anteiso                              | 14.2                              | 29.2            | 29.0                           | 23.0                               | 25.0                               | 37.0                               | 9.4                                |
| C <sub>15:1</sub> anteiso A                            |                                   | 0.8             |                                |                                    |                                    |                                    |                                    |
| C <sub>17:0</sub> anteiso                              | 4.4                               | 9.7             | 11.0                           | 9.0                                | 12.0                               | 19.0                               | 7.4                                |
| C <sub>19:0</sub> anteiso                              |                                   |                 |                                |                                    |                                    | 2.0                                |                                    |
| C <sub>14:0</sub> iso                                  | 2.8                               | 2.7             | 3.0                            | 3.0                                | 2.0                                | 1.0                                | 2.4                                |
| C <sub>15:0</sub> iso                                  | 0.5                               | 0.3             | tr                             |                                    |                                    | Tr                                 |                                    |
| C <sub>16:0</sub> iso                                  | 17.5                              | 14.7            | 14.0                           | 17.0                               | 20.0                               | 10.0                               | 23.4                               |
| C <sub>17:0</sub> iso                                  | 0.5                               | 0.6             | 1.0                            | 1.0                                |                                    | 1.0                                |                                    |
| C <sub>18:0</sub> iso                                  | 0.2                               | 0.2             |                                |                                    |                                    |                                    |                                    |
| <b>Branched-chain hydroxy</b>                          |                                   |                 |                                |                                    |                                    |                                    |                                    |
| C <sub>14:0</sub> iso 3OH                              | 0.5                               |                 |                                |                                    | 2.0                                |                                    | Tr                                 |
| C <sub>15:0</sub> iso 2OH                              | -                                 |                 |                                |                                    | 1.0                                |                                    | -                                  |
| C <sub>16:0</sub> iso 3OH                              |                                   | 0.1             |                                |                                    | 13.0                               |                                    |                                    |
| <b>Summed features</b>                                 |                                   |                 |                                |                                    |                                    |                                    |                                    |
| 2 (C <sub>16:1</sub> iso I/<br>C <sub>14:0</sub> 3OH)  | 0.2                               | 0.1             |                                |                                    |                                    |                                    |                                    |
| 3<br>(C <sub>16:1</sub> ω7c/C <sub>16:1</sub> ω6<br>c) | 27.7                              | 20.5            |                                |                                    |                                    |                                    |                                    |

Except for 8cVS16<sup>T</sup>, 9fVS26 and *L. anisa* (DSM17627<sup>T</sup>), the strains information was obtained from literature: <sup>a</sup>Lambert and Moss, 1988 [27] <sup>b</sup>Thacker et al., 1989 [28]; <sup>c</sup>Crespi et al., 2023 [26].

**Table S3.** Ubiquinones contents of 8cVS16<sup>T</sup>, 9fVS26, *Legionella* most related species and *Lp1*<sup>a</sup>.

| Species <sup>b</sup>           | Accession number        | Q-9    | Q-10   | Q-11   | Q-12   | Q-13   | Q-14   | Q-15  |
|--------------------------------|-------------------------|--------|--------|--------|--------|--------|--------|-------|
| 8cVS16 <sup>T</sup> and 9fVS26 | DSM 114356 <sup>T</sup> |        |        | 0.70%  |        | 50.20% | 39.60% | 1.20% |
| <i>L. anisa</i>                | DSM 17627 <sup>T</sup>  | 12.60% | 33.00% | 24.20% | 26.90% | 2.90%  | 0.40%  |       |
| <i>L. bozeman</i>              | ATCC 33217 <sup>T</sup> | 2-3    | 4      | 3-4    | 4      | tr-1   | -      |       |
| <i>L. parisiensis</i>          | ATCC 35299 <sup>T</sup> | 1-2    | 3-4    | 3      | 4      | 1      | -      |       |
| <i>L. tucsonensis</i>          | ATCC 40180 <sup>T</sup> |        |        |        | NA     |        |        |       |
| <i>L. wadsworthii</i>          | ATCC 33877 <sup>T</sup> | 2      | 4      | 2-3    | tr-1   | -      | -      |       |
| <i>L. pneumophila</i>          | ATCC 33152 <sup>T</sup> | -      | -      | 1-2    | 4      | 1-2    | -      |       |

<sup>a</sup>The numbers indicate the visual estimates of the relative amounts of ubiquinone with the major component labeled as 4; 2, half the amount of 4; 1, half that of 2; -, not detected; NA, not available; tr, traces. Differences between strains within a species are indicated by ranges. <sup>b</sup> Except 8cVS16<sup>T</sup>, 9fVS26 and *L. anisa*, the strains information was obtained from Lambert et al. 1988 [27].

**Table S4.** Comparison among 8cVS16<sup>T</sup> and 9fVS26 strains, *L. anisa* (ATCC 35292<sup>T</sup>) and *L. pneumophila philadelphia* Serogroup 1 (ATCC 33152<sup>T</sup>): list of missing genes.

| Genome comparison                            | Total number of annotated genes | List of missing genes in shorter genome                                                                                                                                                                                                                                                                                                                                                                                                                                                                                                                                                                                                                                                                                                                                                                                                                                                                                                                                                                                                                                                                                                                                                                                                                                                                                                                                                                                                                                                                                                                                                                                                                                                                                                                                                                                                                                                                                                                                                                                                                                                                                                                                                                                                                                                                                                                                                                                                                                                                                                                                                                                                                                                                                                                                                                                                                                                                                                                                                                                                                                                                                                                                                                                                                                                                                                                                                                                                                                                                                                                                                                                                                                                                                                                                                                                                                                                                                                                                                                                                                                                                                                                                                                                                                                                       |
|----------------------------------------------|---------------------------------|-----------------------------------------------------------------------------------------------------------------------------------------------------------------------------------------------------------------------------------------------------------------------------------------------------------------------------------------------------------------------------------------------------------------------------------------------------------------------------------------------------------------------------------------------------------------------------------------------------------------------------------------------------------------------------------------------------------------------------------------------------------------------------------------------------------------------------------------------------------------------------------------------------------------------------------------------------------------------------------------------------------------------------------------------------------------------------------------------------------------------------------------------------------------------------------------------------------------------------------------------------------------------------------------------------------------------------------------------------------------------------------------------------------------------------------------------------------------------------------------------------------------------------------------------------------------------------------------------------------------------------------------------------------------------------------------------------------------------------------------------------------------------------------------------------------------------------------------------------------------------------------------------------------------------------------------------------------------------------------------------------------------------------------------------------------------------------------------------------------------------------------------------------------------------------------------------------------------------------------------------------------------------------------------------------------------------------------------------------------------------------------------------------------------------------------------------------------------------------------------------------------------------------------------------------------------------------------------------------------------------------------------------------------------------------------------------------------------------------------------------------------------------------------------------------------------------------------------------------------------------------------------------------------------------------------------------------------------------------------------------------------------------------------------------------------------------------------------------------------------------------------------------------------------------------------------------------------------------------------------------------------------------------------------------------------------------------------------------------------------------------------------------------------------------------------------------------------------------------------------------------------------------------------------------------------------------------------------------------------------------------------------------------------------------------------------------------------------------------------------------------------------------------------------------------------------------------------------------------------------------------------------------------------------------------------------------------------------------------------------------------------------------------------------------------------------------------------------------------------------------------------------------------------------------------------------------------------------------------------------------------------------------------------------------|
| 9fVS26<br>vs<br>8cVS16 <sup>T</sup>          | 1596<br>vs<br>1595              | <p><b>9fVS26 genes not found in 8cVS16:</b> <i>esiB_1, esiB_2</i></p> <p><b>8cVS16 genes not found in 9fVS26:</b> <i>esiB</i></p> <p><b>8cVS16 genes not found in <i>L. anisa</i>:</b> <i>murU_1, murU_2, sdh, psuK, mdtK, pepA, alx_1, glaR, potA, potB, potD, nat, glsA1, ackA, ytcD, ycdF, tolB_1, cbpD, rssB_1, ypeA, aacA4_1, rssB_2, yhcG, hin, kmo_1, aatB_1, purE, cheW, cheR1, cybA_1, nprV, rcsB, cph1, dauR, atpC, atpD, atpG, atpA, atpF, atpB, recF, cbs, panD, guaC, hldD, cspC, rocG_1, ybaB_1, mhqR, petC_1, petC_2, sspA, ydgA, hrp1_1, ligd, sufS, algC, doeB, rhtC_1, kmo_2, yhaJ, aspC, adhT, cadI_1, nhaP, asnB, treA, gloB_1, pafA_1, rcsA, ctpF, uspE_1, nhaA, acr3, arsC, cadI_2, nfdA, ycaC_1, dnaG_1, bioC, phrA, lolE, ldh, pagN, dps2_1, motA, adc_1, aacA4_2, tdcD, rocG_2, yhjQ, ftsP_1, yhhT, aatB_2, cysC, pcp, panE, hspA, alkA, mtmX, gshA, ykfA_3, dhaA_1, argP, hutG, lcfB_1, pdaC, ycaC_2, ftsI, gtaB, yhjR, bcsQ, yabJ_1, ybaB_2, tadA_1, gltP_1, lexA, ligD, ku_1, aacA4_3, doxA, yrbG, hoxH, asrB, ndhI, hypE, hypD, hypC, hypF, hypB, nixA, uspE_2, pacL, auaG, nqrF, cybA_2, bepA, fabI_4, pafA_2, macA, fcl, pds, arnC_3, rfbC, garP, recB, dprE1, udk_3, qseC, gloB_2, emrA_1, yyaP_1, clcA_3, lacG, guaB, tadA_2, mscS, yyaP_2, ybaB_3, htrA, hpf_1, ydaD, tolB_2, derI, yveA, ibpA, glpE, ftsP_2, pah, hrp1_2, sthA, ynjF, yabJ_2, dadA, bioD1, bioH_1, cmk, thiK, fabH, esiB, dnaG_2, intA, dhaA_2, golD, bioH_2, pksC, xerC, gsbB, gbpA, atm1, aaeB, korB, atoC_3, dauA, ampG_1, tam_3, gdhA, alx_2, rlpA_3, malT, adc_2, ankX, arcB_3, lcfB_2, todT_3, phaB_5, ampG_2, spxA, gltP_2, kdpB_4, sasA_10, ku_2, rcsC_6, mnaT, csdA, vldW, carA_5, arnC_4, yceF, dps2_2, lcfB_3, rhtC_2, hpf_2, ahpD, sasA_11, hemH, csbC, edd, pgl, gadC_4, ybhR_1, btuD_3, ybhR_2, emrA_2, sadH, lemA, oprM_5, oprM_6, murU_3</i></p> <p><b><i>L. anisa</i> genes not found in 8cVS16:</b> <i>catD_1, malT_1, ackA_1, xpkA_1, atpD_1, atpC_1, atpB_1, atpF_1, atpA_1, atpG_1, ftsP, esiB_1, cusA, cusB, lexA_1, cpbD_1, xerC_1, xerC_2, xerC_3, xerC_4, yhaJ_1, kmo, ygiD, algC_1, ldh_1, sufS_1, sspB, sspA_1, petC, petA, hemX, ybaB, rocG, fcl_1, guaB_1, yhaJ_2, panD_1, cysK, recF_1, osmY, atpB_2, atpF_2, atpH_3, atpA_2, atpG_2, atpD_2, atpC_2, glpQ, catD_2, cmpR, tagH, epsL, epsM, per, mhpC, mta, cybA, traM_1, traL_1, traK_1, traJ_1, traI_1, traG_1, virB4_1, lexA_2, egtB_1, egtB_2, gshA_1, hemH_1, purK_1, purE_1, ndhB_1, gltR, apxIB_1, edd_1, glsA1_1, bioD1_1, phrA_1, crtK-2, phrB, ufaA1, purK_2, purE_2, ndhB_2, apxIB_2, panD_2, ddl, ygeA, mdrP, riza, xpkA_2, aacA4, lon2, ephD, bcr, rimL, paaK, sufS_2, glaH, gshA_2, livK, rssB, csbC_1, kdnA, neoG, csbC_2, yveA_1, ohrA, adh, cda, cspV, dnaG, lolE_1, ldh_2, dps2, motA_1, recF_2, xerC_5, xerD_1, xerD_2, wecD_1, csrA_3, thiK_1, desA, baeB, baeC_1, novP, lolE_2, hin_1, lexA_3, aatB, cmk_1, yofA, glaR_1, fixL, cheB_3, ibpA_1, serA, xerD_3, xerD_4, xerC_6, gshA_3, rimJ, dhaA, srkA_3, ttuB, hutG_1, lcfB, htrA_1, ycaC, ftsI_1, gtaB_1, yabJ, mmcO, motA_2, xerC_7, xerD_5, xerD_6, xerC_8, xerD_7, xerD_8, ahpD_1, argT, bepA_1, pafA, pgl_1, spsI, fcl_2, dadA_1, mshA_3, rmlC, gudP, addA, dprE1_1, motB_3, tylM1, mltD, gloB, emrA, yyaP, fadA_3, add, araQ, guaB_2, tadA, gltC, hchA, cyfB, cspA_3, tolB, dltA_3, rpiB, yveA_2, ibpA_2, copB, copA_3, hutG_2, hrp1, thi4, slrP, dadA_2, yajO, bioD1_2, bioH, cmk_2, thiK_2, oprB, fabH_1, esiB_2, baeC_2, xerC_9, dgt, gsta, bioD1_3, glsA1_2, edd_2, besD, ccmH, dauA_1, ampG, sfp, csrA_4, dtpA_4, pal_3, dauA_2, phrA_2, ibpB, htrA_2, spkD, dprE1_2, malT_2, prs_3, cadA, adc, sspA_2, intS_3, csrA_5, celA, gtaB_2, algC_2, wbiB, bepA_2, galE1, ywqF, yfcJ, rayT, yfgD, gltP, ligD_1, ligD_2, ku, mshD_3, tycC, maf, lexA_4, mrgA, hin_2, dltA_4, fabG_6, mepM, spmB, spmA, pepA_1, holC, pepA_2, murJ, rpsT, uvrC, gacA, phhA, cinA, obg, rpmA, rplU, rplY, pth, ychF, ispB, cpbD_2, proP_6, esiB_3, traM_2, traL_2, traK_2, traJ_2, traI_2, traD, traG_2, virB4_2, csrA_6, xerC_10, ftsI_2, mecl, thrB, rhtC, hpf, smc_6, secA_3, ahpD_2, wecD_2, hemH_2, ppaX, csbC_3, edd_3, pgl_2, fabH_2, oleD, ahlD, ttgC, acpP_5, murU, ydfG, pepA_3, alx, frsA, glaR_2, tmoT, fosB, glsA, ackA_2, srfAB</i></p> |
| 8cVS16 <sup>T</sup><br>vs<br><i>L. anisa</i> | 1595<br>vs<br>1677              | <p><b>9fVS26 genes not found in <i>L. anisa</i>:</b> <i>murU_1, murU_2, sdh, psuK, mdtK, pepA, alx_1, glaR, potA, potB, potD, nat, glsA1, ackA, ytcD, ycdF, tolB_1, cbpD, rssB_1, ypeA, aacA4_1, rssB_2, yhcG, hin, kmo_1, aatB_1, purE, cheW, cheR1, cybA_1, nprV, rcsB, cph1, dauR, atpC, atpD, atpG, atpA, atpF, atpB, recF, cbs, panD, guaC, hldD, cspC, rocG_1, ybaB_1, rhtC_1, hpf_1, ahpD, hemH, csbC, edd, pgl, ybhR_1, ybhR_2, emrA_1, sadH, lemA, murU_3, mhqR, petC_1, petC_2, sspA, ydgA, hrp1_1, ligd, sufS, algC, doeB, rhtC_2, kmo_2, yhaJ, aspC, adhT, cadI_1, nhaP, asnB, treA, gloB_1, pafA_1, rcsA, ctpF, uspE_1, nhaA, acr3, arsC, cadI_2, nfdA, ycaC_1, dnaG_1, bioC, phrA, lolE, ldh, pagN, dps2_1, motA, adc_1, aacA4_2, tdcD, rocG_2, yhjQ, ftsP_1, yhhT, aatB_2, cysC, pcp, panE, hspA, alkA, mtmX, gshA, ykfA_3, dhaA_1, argP, hutG, lcfB_1, pdaC, ycaC_2, ftsI, gtaB, yhjR, bcsQ, yabJ_1, ybaB_2, tadA_1, gltP_1, lexA, ligD, ku_1, aacA4_3, doxA, yrbG, hoxH, asrB, ndhI, hypE, hypD, hypC, hypF, hypB, nixA, uspE_2, pacL, auaG, nqrF, cybA_2, bepA, fabI_4, pafA_2, macA, fcl, pds, btuD_3, arnC_3, rfbC, garP, recB, dprE1, udk_3, qseC, gloB_2, emrA_2, oprM_5, yyaP_1, clcA_3, lacG, guaB, tadA_2, mscS, yyaP_2, ybaB_3, htrA, hpf_2, ydaD, tolB_2, derI, yveA, ibpA, glpE, ftsP_2, pah, hrp1_2, sthA, ynjF, yabJ_2, dadA, bioD1, bioH_1, cmk, thiK, fabH, dnaG_2, intA, dhaA_2, golD, bioH_2, pksC, xerC, sasA_10, gsbB, gadC_4, gbpA, atm1, aaeB, korB, atoC_3, dauA, ampG_1, tam_3,</i></p>                                                                                                                                                                                                                                                                                                                                                                                                                                                                                                                                                                                                                                                                                                                                                                                                                                                                                                                                                                                                                                                                                                                                                                                                                                                                                                                                                                                                                                                                                                                                                                                                                                                                                                                                                                                                                                                                                                                                                                                                                                                                                                                                                                                                                                                                                                                                                                                                                                                                                                                                                                                                                                                                                                                                                               |
| 9fVS26<br>vs<br><i>L. anisa</i>              | 1596<br>vs<br>1677              | <p><b>9fVS26 genes not found in <i>L. anisa</i>:</b> <i>murU_1, murU_2, sdh, psuK, mdtK, pepA, alx_1, glaR, potA, potB, potD, nat, glsA1, ackA, ytcD, ycdF, tolB_1, cbpD, rssB_1, ypeA, aacA4_1, rssB_2, yhcG, hin, kmo_1, aatB_1, purE, cheW, cheR1, cybA_1, nprV, rcsB, cph1, dauR, atpC, atpD, atpG, atpA, atpF, atpB, recF, cbs, panD, guaC, hldD, cspC, rocG_1, ybaB_1, rhtC_1, hpf_1, ahpD, hemH, csbC, edd, pgl, ybhR_1, ybhR_2, emrA_1, sadH, lemA, murU_3, mhqR, petC_1, petC_2, sspA, ydgA, hrp1_1, ligd, sufS, algC, doeB, rhtC_2, kmo_2, yhaJ, aspC, adhT, cadI_1, nhaP, asnB, treA, gloB_1, pafA_1, rcsA, ctpF, uspE_1, nhaA, acr3, arsC, cadI_2, nfdA, ycaC_1, dnaG_1, bioC, phrA, lolE, ldh, pagN, dps2_1, motA, adc_1, aacA4_2, tdcD, rocG_2, yhjQ, ftsP_1, yhhT, aatB_2, cysC, pcp, panE, hspA, alkA, mtmX, gshA, ykfA_3, dhaA_1, argP, hutG, lcfB_1, pdaC, ycaC_2, ftsI, gtaB, yhjR, bcsQ, yabJ_1, ybaB_2, tadA_1, gltP_1, lexA, ligD, ku_1, aacA4_3, doxA, yrbG, hoxH, asrB, ndhI, hypE, hypD, hypC, hypF, hypB, nixA, uspE_2, pacL, auaG, nqrF, cybA_2, bepA, fabI_4, pafA_2, macA, fcl, pds, btuD_3, arnC_3, rfbC, garP, recB, dprE1, udk_3, qseC, gloB_2, emrA_2, oprM_5, yyaP_1, clcA_3, lacG, guaB, tadA_2, mscS, yyaP_2, ybaB_3, htrA, hpf_2, ydaD, tolB_2, derI, yveA, ibpA, glpE, ftsP_2, pah, hrp1_2, sthA, ynjF, yabJ_2, dadA, bioD1, bioH_1, cmk, thiK, fabH, dnaG_2, intA, dhaA_2, golD, bioH_2, pksC, xerC, sasA_10, gsbB, gadC_4, gbpA, atm1, aaeB, korB, atoC_3, dauA, ampG_1, tam_3,</i></p>                                                                                                                                                                                                                                                                                                                                                                                                                                                                                                                                                                                                                                                                                                                                                                                                                                                                                                                                                                                                                                                                                                                                                                                                                                                                                                                                                                                                                                                                                                                                                                                                                                                                                                                                                                                                                                                                                                                                                                                                                                                                                                                                                                                                                                                                                                                                                                                                                                                                                                                                                                                                                                                                                                                                                               |



*gdhA*, *alx*\_2, *rlpA*\_3, *malT*, *adc*\_2, *ankX*, *arcB*\_3, *lcfB*\_2, *oprM*\_6, *todT*\_3, *phaB*\_5, *ampG*\_2, *spxA*, *gltP*\_2, *kdpB*\_4, *sasA*\_11, *ku*\_2, *rcsC*\_6, *mnaT*, *csdA*, *vlwW*, *carA*\_5, *arnC*\_4, *yceF*, *dps2*\_2, *lcfB*\_3

***L. anisa* genes not found in 9fVS26:** *catD*\_1, *malT*\_1, *ackA*\_1, *xpkA*\_1, *atpD*\_1, *atpC*\_1, *atpB*\_1, *atpF*\_1, *atpA*\_1, *atpG*\_1, *ftsP*, *cusA*, *cusB*, *lexA*\_1, *cpbD*\_1, *xerC*\_1, *xerC*\_2, *xerC*\_3, *xerC*\_4, *yhaJ*\_1, *kmo*, *ygiD*, *algC*\_1, *ldh*\_1, *sufS*\_1, *sspB*, *sspA*\_1, *petC*, *petA*, *hemX*, *ybaB*, *rocG*, *fcl*\_1, *guaB*\_1, *yhaJ*\_2, *panD*\_1, *cysK*, *recF*\_1, *osmY*, *atpB*\_2, *atpF*\_2, *atpH*\_3, *atpA*\_2, *atpG*\_2, *atpD*\_2, *atpC*\_2, *glpQ*, *catD*\_2, *cmpR*, *tagH*, *epsL*, *epsM*, *per*, *mhpC*, *mta*, *cyaB*, *traM*\_1, *traL*\_1, *traK*\_1, *traJ*\_1, *traI*\_1, *traG*\_1, *virB4*\_1, *lexA*\_2, *egtB*\_1, *egtB*\_2, *gshA*\_1, *hemH*\_1, *purK*\_1, *purE*\_1, *ndhB*\_1, *gltR*, *apxIB*\_1, *edd*\_1, *glsA1*\_1, *bioD1*\_1, *phrA*\_1, *crtK*-2, *phrB*, *ufaA1*, *purK*\_2, *purE*\_2, *ndhB*\_2, *apxIB*\_2, *panD*\_2, *ddl*, *ygeA*, *mdrP*, *riza*, *xpkA*\_2, *aacA4*, *lon2*, *ephD*, *bcr*, *rimL*, *paaK*, *sufS*\_2, *glaH*, *gshA*\_2, *livK*, *rssB*, *csbC*\_1, *kdnA*, *neoG*, *csbC*\_2, *yveA*\_1, *ohrA*, *adh*, *cda*, *csfV*, *dnaG*, *lolE*\_1, *ldh*\_2, *dps2*, *motA*\_1, *recF*\_2, *xerC*\_5, *xerD*\_1, *xerD*\_2, *wecD*\_1, *csrA*\_3, *thiK*\_1, *desA*, *baeB*, *baeC*\_1, *novP*, *lolE*\_2, *hin*\_1, *lexA*\_3, *aatB*, *cmk*\_1, *yofA*, *glaR*\_1, *fixL*, *cheB*\_3, *ibpA*\_1, *serA*, *xerD*\_3, *xerD*\_4, *xerC*\_6, *gshA*\_3, *rimJ*, *dhaA*, *srkA*\_3, *ttuB*, *hutG*\_1, *lcfB*, *htrA*\_1, *ycac*, *ftsI*\_1, *gtaB*\_1, *yabJ*, *mmcO*, *motA*\_2, *xerC*\_7, *xerD*\_5, *xerD*\_6, *xerC*\_8, *xerD*\_7, *xerD*\_8, *ahpD*\_1, *argT*, *bepA*\_1, *paqA*, *pgl*\_1, *spL*, *fcl*\_2, *dadA*\_1, *mshA*\_3, *rmlC*, *gudP*, *addA*, *dprE1*\_1, *motB*\_3, *tylM1*, *mltD*, *gloB*, *emrA*, *yyaP*, *fadA*\_3, *add*, *araQ*, *guaB*\_2, *tadA*, *gltC*, *hchA*, *cvfB*, *csfA*\_3, *tolB*, *dltA*\_3, *rpiB*, *yveA*\_2, *ibpA*\_2, *copB*, *copA*\_3, *hutG*\_2, *hrp1*, *thi4*, *slrP*, *dadA*\_2, *yajO*, *bioD1*\_2, *bioH*, *cmk*\_2, *thiK*\_2, *oprB*, *fabH*\_1, *baeC*\_2, *xerC*\_9, *dgt*, *gstA*, *bioD1*\_3, *glsA1*\_2, *edd*\_2, *besD*, *ccmH*, *dauA*\_1, *ampG*, *sfp*, *csrA*\_4, *dtpA*\_4, *pal*\_3, *dauA*\_2, *phrA*\_2, *ibpB*, *htrA*\_2, *spkD*, *dprE1*\_2, *malT*\_2, *prs*\_3, *cadA*, *adc*, *sspA*\_2, *intS*\_3, *csrA*\_5, *celA*, *gtaB*\_2, *algC*\_2, *wbiB*, *bepA*\_2, *galE1*, *ywqF*, *yfcJ*, *rayT*, *yfgD*, *gltP*, *ligD*\_1, *ligD*\_2, *ku*, *mshD*\_3, *tycC*, *maf*, *lexA*\_4, *mrgA*, *hin*\_2, *dltA*\_4, *fabG*\_6, *mepM*, *spmB*, *spmA*, *pepA*\_1, *holC*, *pepA*\_2, *murJ*, *rpsT*, *uvrC*, *gacA*, *phhA*, *cinA*, *obg*, *rpmA*, *rplU*, *rplY*, *pth*, *ychF*, *ispB*, *cpbD*\_2, *proP*\_6, *esiB*\_3, *traM*\_2, *traL*\_2, *traK*\_2, *traJ*\_2, *traI*\_2, *traD*, *traG*\_2, *virB4*\_2, *csrA*\_6, *xerC*\_10, *ftsI*\_2, *mecI*, *thrB*, *rhtC*, *hpf*, *smc*\_6, *secA*\_3, *ahpD*\_2, *wecD*\_2, *hemH*\_2, *ppaX*, *csbC*\_3, *edd*\_3, *pgl*\_2, *fabH*\_2, *oleD*, *ahlD*, *ttgC*, *acpP*\_5, *murU*, *ydfG*, *pepA*\_3, *alx*, *frsA*, *glaR*\_2, *tmoT*, *fosB*, *glsA*, *ackA*\_2, *srfAB*

**8cVS16 genes not found in *L. pneumophila* SG1:** *murU*\_1, *murU*\_2, *chrA*, *ykfA*\_1, *sdh*, *leuC*, *psuK*, *ybhF*, *ttgI*\_1, *gpx1*, *hit*, *mdtK*, *pepA*, *alx*\_1, *iucD*, *glaR*, *todT*\_1, *yecN*, *per1*, *nat*, *budB*, *gabD*\_1, *glsA1*, *ykfA*\_2, *fabI*\_1, *yacG*, *yteD*, *ycdF*, *xylE*, *tolB*\_1, *cbpD*, *rssB*\_1, *divK*, *gatA*\_1, *ypeA*, *oatA*\_1, *fdhA*, *argE*\_1, *yffB*, *aacA4*\_1, *hss*\_1, *rssB*\_2, *chaB*, *yfiC*, *MENG*, *yhcG*, *desA3*, *kmo*\_1, *aatB*\_1, *gap*, *cheW*, *cheR1*, *cheB*\_1, *cyaB*\_1, *gpmA*, *nprV*, *rcsB*, *rcp1*\_1, *rcp1*\_2, *cph1*, *dauR*, *tdcB*, *resA*\_1, *fadI*, *arcB*\_1, *proC*\_1, *bepG*, *atpC*, *atpD*, *atpG*, *atpA*, *atpF*, *atpB*, *yidD*, *resA*\_2, *hap*, *yhdE*, *msrA*, *aroK*\_1, *parA*, *ybgC*\_1, *algA*\_1, *rna*, *clcA*\_1, *oatA*\_2, *wbpI*, *capD*, *rmlD*\_1, *wecA*, *hldD*, *wzxE*, *chrR*, *csfC*, *rocG*\_1, *hinT*, *ybaB*\_1, *cca*\_1, *czcD*\_1, *mhqR*, *petC*\_1, *petC*\_2, *amiC*\_1, *yggR*, *dltA*\_1, *ydgA*, *hrp1*\_1, *ligd*, *cheB*\_2, *cmdF*, *clcA*\_2, *doeB*, *dltA*\_2, *pknD*\_1, *dgkA*, *rhtC*\_1, *tcmN*, *kmo*\_2, *nudC*\_1, *tetA*, *czcD*\_2, *slyA*\_1, *nhaK*, *fmdA*, *adhT*, *dapL*, *cadI*\_1, *nhaP*, *slyA*\_2, *asnB*, *treA*, *gloB*\_1, *paqA*\_1, *rcsA*, *ctfP*, *uspE*\_1, *nhaA*, *acr3*, *arsC*, *cadI*\_2, *nfdA*, *ycac*\_1, *dnaG*\_1, *mdh*\_1, *mmpA*, *bioC*, *mshA*\_1, *rspB*, *ribBA*\_1, *pagN*, *dps2*\_1, *adc*\_1, *bcd*, *aacA4*\_2, *phaB*\_4, *fabI*\_2, *fabI*\_3, *tdcD*, *rocG*\_2, *hmp*\_1, *yhjQ*, *ftsP*\_1, *intS*\_1, *psdht*, *yhhT*, *aatB*\_2, *cysC*, *yfeW*\_1, *pcp*, *greB*, *sasA*\_4, *rstA*, *rihA*, *panE*, *hdjR*, *nanT*\_1, *phnY*, *phnZ*, *gamA*, *asnC*, *asnA*, *cidA*, *cynR*, *dgda*, *csfA*\_1, *sasA*\_5, *todT*\_2, *sasA*\_6, *hspA*, *rhaS*, *alkA*, *pdxB*\_1, *mtnX*, *ftsH4*, *dhpH*, *rutB*, *fbiB*\_1, *ykfA*\_3, *speE*\_3, *inhA*, *arnC*\_1, *guaD*, *tqsA*, *dhaA*\_1, *dbpA*\_1, *cysZ*, *pnoA*, *tdh*, *lcfB*\_1, *pcpR*, *alr*, *dapE*, *dapD*\_1, *ycac*\_2, *ftsI*, *pdxB*\_2, *pmdD*, *kimA*, *fixB*, *aroK*\_2, *proC*\_2, *bcsG*, *bcsC*, *gtaB*, *yhjR*, *bcsQ*, *bcsA*, *bcsB*, *bcsZ*, *yabJ*\_1, *thiS*, *moeZ*, *ybaB*\_2, *tadA*\_1, *intS*\_2, *gltP*\_1, *lexA*, *umuC*, *ligD*, *ku*\_1, *aacA4*\_3, *dox*, *srpC*, *fbiB*\_2, *kdpB*\_3, *uspE*\_2, *pacL*, *atl*, *auaG*, *nqrF*, *cyaB*\_2, *sasA*\_7, *arl1*, *cmoA*, *thiM*, *menI*, *aes*, *nanT*\_2, *norM*, *ribBA*\_2, *fabI*\_4, *paqA*\_2, *acdA*, *bioF*\_1, *yghO*, *pimA*, *ttgF*, *tagG*, *fcl*, *gmd*\_1, *algA*\_2, *rjbG*, *rjbF*, *pds*, *patA*, *gmd*\_2, *arnC*\_2, *mshA*\_2, *arnC*\_3, *rmlD*\_2, *rffH*, *lysA*\_1, *recB*, *lysA*\_2, *mdh*\_2, *flhB*, *flhA*\_1, *lysS*, *cpoB*\_1, *gloB*\_2, *farB*, *emrA*\_1, *yyaP*\_1, *degQ*, *gabD*\_2, *sufA*, *gata*\_2, *artP*\_1, *clcA*\_3, *ppsC*, *tadA*\_2, *mscS*, *yyaP*\_2, *fusA*\_1, *appB*, *ttgI*\_2, *ybaB*\_3, *hpf*\_1, *ybiT*, *csfA*\_2, *pknD*\_2, *ydaD*, *csrA2*, *sdhE*, *rpoE*, *ybgC*\_2, *tolB*\_2, *bamB*\_1, *derI*, *yveA*, *dacB*, *adiC*, *ibpA*, *glpE*, *ftsP*\_2, *yvgN*, *pah*, *hrp1*\_2, *csd*, *yjiG*, *sthA*, *ynjF*, *COQ3*\_3, *yabJ*\_2, *menH*\_3, *dadA*, *FCS1*, *amiC*\_2, *rcsC*\_4, *carA*\_3, *ydjP*, *cpg2*\_1, *speE*\_4, *bioD1*, *bioH*\_1, *bioF*\_2, *pdeG*, *secA*\_1, *dacC*\_1, *ybeZ*, *sasA*\_8, *lapB*, *fabG*\_3, *fabH*, *lpxB*, *esiB*, *dnaG*\_2, *intA*, *dhaA*\_2, *nhaP2*, *golD*, *bioH*\_2, *kynu*, *yybR*, *potE*, *erg*, *pksC*, *hisH*, *hisF*, *kup*, *xerC*, *dacC*\_2, *secA*\_2, *mtfA*, *sasA*\_9, *mmpL3*, *hmp*\_2, *menH*\_4, *gbpA*, *rbn*\_1, *alkB2*, *carA*\_4, *cca*\_2, *slyA*\_3, *kata*, *atm1*, *yijE*, *hipA*, *aaeB*, *aaeA*, *hisC*\_3, *rhaR*, *atoC*\_3, *thiD*, *dauA*, *ampG*\_1, *cpoB*\_2, *gdhA*, *alx*\_2, *rlpA*\_3, *pbpE*, *dbpA*\_2, *capB*\_3, *rcsC*\_5, *lgrD*, *malT*, *bamB*\_2, *adc*\_2, *artP*\_2, *argF*, *ybaA*, *arcB*\_2, *flp*, *arcB*\_3, *argE*\_2, *lcfB*\_2, *lrp*, *todT*\_3, *phaB*\_5, *ampG*\_2, *caiA*, *spxA*, *gltP*\_2, *kdpA*, *kdpB*\_4, *kdpC*, *kdpD*, *flhA*\_2, *fabG*\_4, *sasA*\_10, *rcp1*\_3, *ku*\_2, *aldH1*, *rcsC*\_6, *cpg2*\_2, *selO*, *mnaT*, *sodC1*, *csdA*, *vlwW*, *ahcY*\_3, *carA*\_5, *aroH*, *arnC*\_4, *decR*, *iaaA*, *cphB*, *ybaL*, *yfeW*\_2, *dipZ*, *madD*, *ndh*, *lysP*, *proP*\_5, *dam*, *sauU*\_3, *dps2*\_2, *nanT*\_3, *arnT*, *ctb*, *cydB*, *dapD*\_2, *lcfB*\_3, *dltC*, *fabG*\_5, *nphT7*, *emrD*\_1, *cpdA*\_3, *aroK*\_3, *hss*\_2, *lpxA*, *rhtC*\_2, *hpf*\_2, *fpr*, *emrD*\_2, *phaC*\_5, *smc*\_5, *ompR*, *sasA*\_11, *mdtC*\_1, *pgl*, *stp*, *emrA*\_2, *oprM*\_4, *sadH*, *lemA*, *mdtA*\_5, *oprM*\_5, *oprM*\_6, *mdtC*\_2, *rbn*\_2, *pasI*, *lpxL*, *acpP*\_4, *nudC*\_2, *fusA*\_2, *murU*\_3

8cVS16<sup>T</sup> 1595  
vs vs  
*L. pneumophila* 1508

***L. pneumophila* SG1 genes not found in 8cVS16:** *resA*, *hap\_1*, *cat*, *merR*, *aroH\_1*, *ddl\_1*, *ydeN*, *msrA\_1*, *ynjF\_1*, *cdgJ*, *gapA*, *yedI*, *cynR\_1*, *mhpA*, *pbuE*, *ddaF*, *rbsB*, *frcA*, *rbsC*, *dapE\_1*, *yfdE*, *katG2*, *cydB\_1*, *phrB*, *pknD*, *crtK-2*, *lrgA*, *cynR\_2*, *purK*, *ndhB*, *glcC*, *lagD*, *yveA\_1*, *mdlC*, *sidE*, *bpoC*, *glsA*, *yfgD*, *yhhQ*, *ttgC\_1*, *emrA*, *yfbR*, *fosA*, *ydfG*, *murU*, *secE*, *fusA*, *lpxL\_1*, *ddl\_2*, *osmY*, *ogt*, *nagB*, *cspD*, *ttgC\_2*, *cfiA*, *dmpP*, *hpf*, *artJ\_3*, *argI*, *add*, *cdsA*, *lpxA\_1*, *ytbE*, *fosB*, *plsC*, *spmA*, *spmB*, *mepM*, *pabC*, *ydzJ*, *arnT\_1*, *nanT*, *dam\_1*, *ybhF\_1*, *norW*, *adc*, *artJ\_4*, *ybhF\_2*, *dps2*, *gsiA*, *tdh\_1*, *cusS*, *czcR*, *alr-1*, *hisF\_1*, *hisH\_1*, *neuA*, *neuB\_1*, *epsM*, *rmlD*, *rmlA*, *rfbB*, *tagO*, *neuB\_2*, *kpsM*, *wbbL*, *blh*, *patA\_1*, *ampG*, *dauA\_1*, *rsbV*, *ybgI*, *lolC*, *ccmH*, *lapB\_1*, *glpP*, *dapE\_2*, *dapD*, *yihG*, *kmo*, *ycaC*, *ftsI\_1*, *pdxB*, *etfA*, *aroK*, *csrA2\_1*, *cadA\_1*, *cadA\_2*, *cusB\_1*, *cusA\_1*, *ftsP*, *hmp*, *atpG\_1*, *atpA\_1*, *atpF\_1*, *atpB\_1*, *atpC\_1*, *atpD\_1*, *esiB\_1*, *intS*, *yhcG\_1*, *xerC\_1*, *murJ\_1*, *yqaB*, *cusB\_2*, *cusA\_2*, *msrB\_1*, *kaiB*, *kaiC*, *mltD\_1*, *fliY*, *artJ\_5*, *guaD\_1*, *ousA*, *argE*, *cutD*, *esiB\_2*, *zraR*, *bphD*, *ribBA*, *kup\_1*, *hisF\_2*, *hisH\_2*, *cydB\_2*, *proX*, *slyA*, *rhtC*, *yhcG\_2*, *Int-Tn*, *yedK*, *lexA\_1*, *umuC\_1*, *vsr*, *recD2*, *virB9*, *virB4*, *csrA2\_2*, *lexA\_2*, *mltD\_2*, *gloB*, *yejM*, *spnN*, *degP*, *gabD*, *esiB\_3*, *gspH*, *lpxB\_1*, *calB*, *yedF\_1*, *fabH\_1*, *gudP*, *arnC*, *arnT\_2*, *udp*, *lapB\_2*, *cpxA*, *yciV*, *secA*, *zapD*, *bioF*, *bioH*, *bioD*, *decR\_1*, *dacC*, *dat*, *apxIB*, *hepA*, *hlyD*, *yddE*, *dtpA\_4*, *bamB*, *lapB\_3*, *artJ\_6*, *sthA\_1*, *moeZ\_1*, *tolB*, *ybgC*, *algU*, *yfiC\_1*, *mta*, *ftsI\_2*, *blal*, *ahlD*, *oleD*, *fabH\_2*, *mneA*, *thrC*, *galP*, *empA*, *dcsG*, *glgE*, *ung*, *umuC\_2*, *lexA\_3*, *cpg2*, *tadA*, *tdh\_2*, *clcA*, *gata*, *iscA*, *lysU*, *flhA*, *flhB\_1*, *flp*, *lysA*, *addA*, *acdA\_1*, *gmhB*, *moeZ\_2*, *pafA*, *fabI*, *xerC\_2*, *clsB*, *lgoT*, *clcB*, *tgpA*, *pilE1\_1*, *pilE1\_2*, *hipA\_1*, *yfiC\_2*, *pksJ*, *tycC*, *acrC*, *mmgB*, *dltC\_1*, *cypB*, *yxaF*, *yhbO*, *setA*, *guaD\_2*, *yypA*, *yabJ*, *proC*, *aroH\_2*, *cpoB*, *xerC\_3*, *atmI\_1*, *atmI\_2*, *dkgA*, *mazG*, *dam\_2*, *traD*, *traN*, *traC*, *traV*, *csrA\_3*, *lexA\_4*, *msrA\_2*, *msrB\_2*, *ynjF\_2*, *sthA\_2*, *msrAB*, *dbpA*, *kup\_2*, *czcA\_3*, *czcC\_3*, *pcpR\_1*, *aadK*, *atmI\_3*, *sdeA\_1*, *sidJ\_1*, *sdeA\_2*, *ycgJ*, *rhaS\_1*, *oqxB13*, *dltA*, *tam\_4*, *alx*, *ibpA\_1*, *ibpA\_2*, *dauA\_2*, *cynT*, *dtpA\_5*, *patA\_2*, *chiA*, *esiB\_4*, *dltC\_2*, *fabH\_3*, *bcr\_1*, *dhaT*, *addB*, *azoR1*, *tam\_5*, *dagK*, *sodC*, *mdh*, *nudE*, *aam*, *dnaG*, *hipA\_2*, *leuO*, *mgtA*, *dmlR\_3*, *kup\_3*, *yveA\_2*, *katG1*, *aacA4*, *pcpR\_2*, *fenF*, *bcr\_2*, *elaA*, *rcp1*, *drdA*, *sidD*, *ibpB*, *kynB*, *hss*, *cqsS\_1*, *sidJ\_2*, *decR\_2*, *glbN*, *gcoB*, *rhaS\_2*, *lexA\_5*, *acdA\_2*, *flhB\_2*, *vanX*, *dprA*, *pepA\_1*, *holC*, *pepA\_2*, *murJ\_2*, *rpsT*, *uvrC*, *gacA*, *phhA*, *cinA*, *obg*, *rpmA*, *rplU*, *rplY*, *pth*, *ychF*, *ispB*, *cfiB*, *yhcR*, *ghrB*, *leuB*, *tam\_6*, *petC*, *petA*, *egtC\_3*, *aseR*, *cqsA*, *cqsS\_2*, *czcD*, *cca*, *ybaB*, *yajO*, *APOA1BP*, *cspE*, *lubX*, *tpm*, *mdtL\_3*, *nylA*, *ravA*, *yedF\_2*, *fadM*, *algA*, *soj*, *hcaC*, *mshA*, *msrA\_3*, *lpxL\_2*, *lpxL\_3*, *lpxA\_2*, *lpxD\_3*, *lpxB\_2*, *asnO*, *rbn*, *hap\_2*, *atpC\_2*, *atpD\_2*, *atpG\_2*, *atpA\_2*, *atpF\_2*, *atpH\_3*, *atpB\_2*, *alkB1*

**9fVS26 genes not found in *L. pneumophila* SG1:** *murU\_1*, *murU\_2*, *chrA*, *ykfA\_1*, *sdh*, *leuC*, *psuK*, *ybhF*, *ttgI\_1*, *gpx1*, *hit*, *mdtK*, *pepA*, *alx\_1*, *iucD*, *glar*, *todT\_1*, *yecN*, *per1*, *nat*, *budB*, *gabD\_1*, *glsA1*, *ykfA\_2*, *fabI\_1*, *yacG*, *ytcd*, *yedF*, *xylE*, *tolB\_1*, *chpD*, *rssB\_1*, *divK*, *gatA\_1*, *yveA*, *oatA\_1*, *fdhA*, *argE\_1*, *yffB*, *aacA4\_1*, *hss\_1*, *rssB\_2*, *chaB*, *yfiC*, *MENG*, *yhcG*, *desA3*, *kmo\_1*, *aatB\_1*, *gap*, *cheW*, *cheR1*, *cheB\_1*, *cyaB\_1*, *gpmA*, *nprV*, *rcsB*, *rcp1\_1*, *rcp1\_2*, *cph1*, *dauR*, *tdcB*, *resA\_1*, *fadI*, *arcB\_1*, *proC\_1*, *bepG*, *atpC*, *atpD*, *atpG*, *atpA*, *atpF*, *atpB*, *yidD*, *resA\_2*, *hap*, *yhdE*, *msrA*, *aroK\_1*, *parA*, *ybgC\_1*, *algA\_1*, *rna*, *clcA\_1*, *oatA\_2*, *wbpl*, *capD*, *rmlD\_1*, *wecA*, *hldD*, *wzx*, *chrR*, *cspC*, *rocG\_1*, *hinT*, *ybaB\_1*, *cca\_1*, *czcD\_1*, *aroK\_2*, *hss\_2*, *lpxA*, *rhtC\_1*, *hpf\_1*, *fpr*, *emrD\_1*, *ompR*, *sasA\_4*, *mdtC\_1*, *pgl*, *stp*, *emrA\_1*, *sadH*, *lemA*, *oprM\_4*, *mdtC\_2*, *rbn\_1*, *pasI*, *lpxL*, *nudC\_1*, *fusA\_1*, *murU\_3*, *mhqR*, *petC\_1*, *petC\_2*, *amiC\_1*, *yggR*, *dltA\_1*, *ydga*, *hrp1\_1*, *ligd*, *cheB\_2*, *cmdF*, *clcA\_2*, *doeB*, *dltA\_2*, *pknD\_1*, *dgkA*, *rhtC\_2*, *icmN*, *kmo\_2*, *nudC\_2*, *tetA*, *czcD\_2*, *slyA\_1*, *nhaK*, *fmdA*, *adhT*, *dapL*, *cadI\_1*, *nhaP*, *slyA\_2*, *asnB*, *treA*, *gloB\_1*, *pafA\_1*, *rcsA*, *ctfP*, *uspE\_1*, *nhaA*, *acr3*, *arsC*, *cadI\_2*, *nfdA*, *ycaC\_1*, *dnaG\_1*, *mdh\_1*, *mmpA*, *bioC*, *mshA\_1*, *rspB*, *ribBA\_1*, *pagN*, *dps2\_1*, *adc\_1*, *bcd*, *aacA4\_2*, *phaB\_4*, *fabI\_2*, *fabI\_3*, *tdcD*, *rocG\_2*, *hmp\_1*, *yhjQ*, *ftsP\_1*, *intS\_1*, *psdht*, *yhhT*, *aatB\_2*, *cysC*, *yfeW\_1*, *pcp*, *greB*, *sasA\_5*, *rstA*, *rihA*, *panE*, *hdfR*, *nanT\_1*, *phnY*, *phnZ*, *gamA*, *asnC*, *asnA*, *cidA*, *cynR*, *dgdA*, *cspA\_1*, *sasA\_6*, *todT\_2*, *sasA\_7*, *hspA*, *rhaS*, *alkA*, *pdxB\_1*, *minX*, *ftsH4*, *dhpH*, *rutB*, *fbiB\_1*, *ykfA\_3*, *speE\_3*, *inhA*, *arnC\_1*, *guaD*, *tsaA*, *dhaA\_1*, *dbpA\_1*, *cysZ*, *pnoA*, *tdh*, *lcfB\_1*, *pcpR*, *mdtA\_5*, *alr*, *dapE*, *dapD\_1*, *ycaC\_2*, *ftsI*, *pdxB\_2*, *pmdD*, *kimA*, *fixB*, *aroK\_3*, *proC\_2*, *bcsG*, *bcsC*, *gtaB*, *yhjR*, *bcsQ*, *bcsA*, *bcsB*, *bcsZ*, *yabJ\_1*, *thiS*, *moeZ*, *ybaB\_2*, *tadA\_1*, *intS\_2*, *glpP\_1*, *lexA*, *umuC*, *ligD*, *ku\_1*, *aacA4\_3*, *doxA*, *srpC*, *fbiB\_2*, *kdpB\_3*, *uspE\_2*, *pacL*, *atl*, *aauG*, *nqrF*, *cyaB\_2*, *sasA\_8*, *artI*, *cmoA*, *thiM*, *menI*, *aes*, *nanT\_2*, *norM*, *ribBA\_2*, *fabI\_4*, *pafA\_2*, *acdA*, *bioF\_1*, *yghO*, *pimA*, *ttgF*, *tagG*, *fcl*, *gmd\_1*, *algA\_2*, *rfbG*, *rfbF*, *pds*, *patA*, *gmd\_2*, *arnC\_2*, *mshA\_2*, *arnC\_3*, *rmlD\_2*, *rffH*, *lysA\_1*, *recB*, *lysA\_2*, *mdh\_2*, *flhB*, *flhA\_1*, *lysS*, *cpoB\_1*, *gloB\_2*, *farB*, *emrA\_2*, *oprM\_5*, *yypA\_1*, *degQ*, *gabD\_2*, *sufA*, *gatA\_2*, *artP\_1*, *clcA\_3*, *ppsC*, *tadA\_2*, *mshC*, *yypA\_2*, *fusA\_2*, *appB*, *ttgI\_2*, *ybaB\_3*, *hpf\_2*, *ybiT*, *cspA\_2*, *pknD\_2*, *ydaD*, *csrA2*, *sdhE*, *rpoE*, *ybgC\_2*, *tolB\_2*, *bamB\_1*, *derI*, *yveA*, *dacB*, *adiC*, *ibpA*, *glpE*, *ftsP\_2*, *yvgN*, *pah*, *hrp1\_2*, *csd*, *yjiG*, *sthA*, *ynjF*, *COQ3\_3*, *yabJ\_2*, *menH\_3*, *dadA*, *FCS1*, *amiC\_2*, *rcsC\_4*, *carA\_3*, *ydjP*, *cpg2\_1*, *speE\_4*, *bioD1*, *bioH\_1*, *bioF\_2*, *pdeG*, *secA\_1*, *dacC\_1*, *ybeZ*, *sasA\_9*, *lapB*, *fabG\_3*, *fabH*, *lpxB*, *dnaG\_2*, *intA*, *dhaA\_2*, *nhaP2*, *golD*, *bioH\_2*, *kynu*, *yybR*, *potE*, *erg*, *pksC*, *hisH*, *hisF*, *kup*, *xerC*, *dacC\_2*, *secA\_2*, *mtfA*, *sasA\_10*, *mmpL3*, *hmp\_2*, *menH\_4*, *gbpA*, *rbn\_2*, *alkB2*, *carA\_4*, *cca\_2*, *slyA\_3*, *kata*, *atmI*, *yijE*, *hipA*, *aaeB*, *aaeA*, *hisC\_3*, *rhaR*, *atoC\_3*, *thiD*, *smc\_5*, *dauA*, *ampG\_1*, *cpoB\_2*, *gdhA*, *alx\_2*, *rlpA\_3*, *pdpE*, *dbpA\_2*, *capB\_3*, *rcsC\_5*, *lgrD*, *malT*, *bamB\_2*, *adc\_2*, *artP\_2*, *argF*, *ybaA*, *arcB\_2*, *flp*, *arcB\_3*, *argE\_2*, *lcfB\_2*, *lrp*, *oprM\_6*, *todT\_3*, *phaB\_5*, *ampG\_2*, *caiA*, *spxA*, *phaC\_5*, *glpP\_2*, *kdpA*, *kdpB\_4*, *kdpC*, *kdpD*, *flhA\_2*, *fabG\_4*, *sasA\_11*, *rcp1\_3*, *ku\_2*, *aldH1*, *rcsC\_6*, *cpg2\_2*, *selO*, *mnaT*, *sodC1*, *csdA*, *vldW*, *ahcY\_3*, *carA\_5*, *aroH*, *arnC\_4*, *decR*, *iaaA*, *cphB*, *ybaL*, *yfeW\_2*, *dipZ*, *madD*, *ndh*, *lysP*, *proP\_5*

|                       |      |
|-----------------------|------|
| 9fVS26                | 1596 |
| vs                    | vs   |
| <i>L. pneumophila</i> | 1508 |

dam, sauU\_3, dps2\_2, nanT\_3, arnT, ctb, cydB, dapD\_2, lcfB\_3, dltC, fabG\_5, nphT7, acpP\_4, emrD\_2, cpdA\_3

**L. pneumophila SG1 genes not found in 9fVS26:** resA, hap\_1, cat, merR, aroH\_1, ddl\_1, ydeN, msrA\_1, ynfF\_1, cdgJ, gapA, yedI, cynR\_1, mhpA, pbuE, ddaF, rbsB, frcA, rbsC, dapE\_1, yfdE, katG2, cydB\_1, phrB, pknD, crtK-2, lrgA, cynR\_2, purK, ndhB, gltC, lagD, yveA\_1, mdlC, sidE, bpoC, glsA, yfgD, yhhQ, ttgC\_1, emrA, yfbR, fosA, ydfG, murU, secE, fusA, lpxL\_1, ddl\_2, osmY, ogt, nagB, cspD, ttgC\_2, cfiA, dmpP, hpf, artJ\_3, argI, add, cdsA, lpxA\_1, ytbE, fosB, plsC, spmA, spmB, mepM, pabC, ydjZ, arnT\_1, nanT, dam\_1, ybhF\_1, norW, adc, artJ\_4, ybhF\_2, dps2, gsiA, tdh\_1, cusS, czcR, alr-1, hisF\_1, hisH\_1, neuA, neuB\_1, epsM, rmlD, rmlA, rfbB, tagO, neuB\_2, kpsM, wbbL, blh, patA\_1, ampG, dauA\_1, rsbV, ybgI, lolC, ccmH, lapB\_1, gltP, dapE\_2, dapD, yihG, kmo, ycaC, ftsI\_1, pdxB, etfA, aroK, csrA2\_1, cadA\_1, cadA\_2, cusB\_1, cusA\_1, ftsP, hmp, atpG\_1, atpA\_1, atpF\_1, atpB\_1, atpC\_1, atpD\_1, intS, yhcG\_1, xerC\_1, murJ\_1, yqaB, cusB\_2, cusA\_2, msrB\_1, kaiB, kaiC, mltD\_1, fliY, artJ\_5, guaD\_3, oasA, argE, cutD, zraR, bphD, ribBA, kup\_1, hisF\_2, hisH\_2, cydB\_2, proX, slyA, rhtC, yhcG\_2, Int-Tn, yedK, lexA\_1, umuC\_1, vsr, recD2, virB9, virB4, csrA2\_2, lexA\_2, mltD\_2, gloB, yejM, spnN, degP, gabD, esiB\_3, gspH, lpxB\_1, calB, ycdF\_1, fabH\_1, gudP, arnC, arnT\_2, udp, lapB\_2, cpxA, yciV, secA, zapD, bioF, bioH, bioD, decR\_1, dacC, dat, apxIB, hepA, hlyD, yddE, dtpA\_4, bamB, lapB\_3, artJ\_6, sthA\_1, moeZ\_1, tolB, ybgC, algU, yfiC\_1, mta, ftsI\_2, blaI, ahlD, oleD, fabH\_2, mneA, thrC, galP, empA, dcsG, glgE, ung, umuC\_2, lexA\_3, cpg2, tadA, tdh\_2, clcA, gatA, iscA, lysU, flhA, flhB\_1, fliP, lysA, addA, acdA\_1, gmhB, moeZ\_2, pafA, fabI, xerC\_2, clsB, lgoT, clcB, tgpA, pilE1\_1, pilE1\_2, hipA\_1, yfiC\_2, pksJ, tycC, acrC, mmgB, dltC\_1, cypB, yxaF, yhbO, setA, guaD\_2, yyaP, yabJ, proC, aroH\_2, cpoB, xerC\_3, atm1\_1, atm1\_2, dkgA, mazG, dam\_2, traD, traN, traC, traV, csrA\_3, lexA\_4, msrA\_2, msrB\_2, ynfF\_2, sthA\_2, msrAB, dbpA, kup\_2, czcA\_3, czcC\_3, pcpR\_1, aadK, atm1\_3, sdeA\_1, sidJ\_1, sdeA\_2, ycgJ, rhaS\_1, oqxBI3, dltA, tam\_4, alx, ibpA\_1, ibpA\_2, dauA\_2, cynT, dtpA\_5, pata\_2, chiA, esiB\_4, dltC\_2, fabH\_3, bcr\_1, dhaT, addB, azoR1, tam\_5, dagK, sodC, mdh, nudE, aam, dnaG, hipA\_2, leuO, mgtA, dmlR\_3, kup\_3, yveA\_2, katG1, aacA4, pcpR\_2, fenF, bcr\_2, elaA, rcpl, drrA, sidD, ibpB, kynB, hss, cqsS\_1, sidJ\_2, decR\_2, glbN, gcoB, rhaS\_2, lexA\_5, acdA\_2, flhB\_2, vanX, dprA, pepA\_1, holC, pepA\_2, murJ\_2, rpsT, uvrC, gacA, phhA, cinA, obg, rpmA, rplU, rplY, pth, ychF, ispB, cfiB, yhcR, ghrB, leuB, tam\_6, petC, petA, egtC\_3, aseR, cqsA, cqsS\_2, czcD, cca, ybaB, yajO, APOA1BP, cspE, lubX, tpm, matL\_3, nylA, ravA, ycdF\_2, fadM, algA, soj, hcaC, mshA, msrA\_3, lpxL\_2, lpxL\_3, lpxA\_2, lpxD\_3, lpxB\_2, asnO, rbn, hap\_2, atpC\_2, atpD\_2, atpG\_2, atpA\_2, atpF\_2, atpH\_3, atpB\_2, alkB1

**L. anisa genes not found in L. pneumophila SG1:** catD\_1, malt\_1, fabI\_1, ackA\_1, xpkA\_1, hmp\_1, cusA, cusB, cpbD\_1, xerC\_4, slyA\_1, czcD\_1, yhaJ\_1, nudC\_1, tcmN, ygiD, dgkA, pknD\_1, dltA\_1, cmdF, algC\_1, ldh\_1, sufS\_1, dltA\_2, yggR, amiC\_1, sspB, sspA\_1, slyA\_2, hemX, czcD\_2, cca\_1, hinT, rocG, cheB\_1, cspA\_1, chrR, wzxE, fcl\_1, wecA, rmlD\_1, capD, wbpI, oata\_1, clcA\_1, guaB\_1, rna, algA\_1, ybgC\_1, parA, yhaJ\_2, msrA, yhdE, panD\_1, cysK, hap, resA\_1, recF\_1, yidD, bepG, proC\_1, arcB\_1, glpQ, fadI, catD\_2, cmpR, mshA\_1, tagH, epsL, per, mhpC, pknD\_2, resA\_2, tdcB, rcpl\_1, rcpl\_2, gpmA, cyaB, cheB\_2, gap, traM\_1, traL\_1, traK\_1, traJ\_1, traI\_1, traG\_1, virB4\_1, egtB\_1, egtB\_2, gshA\_1, hemH\_1, purK\_1, purE\_1, ndhB\_1, gltR, apxIB\_1, edd\_1, glsA1\_1, bioD1\_1, phrA\_1, appB, ufaA1, purK\_2, purE\_2, ndhB\_2, hsfR, apxIB\_2, menH\_3, panD\_2, ddl, ygeA, mdrP, riza, xpkA\_2, MENG, yfiC, chaB, hss\_1, yffB, lon2, ephD, argE\_1, fdhA, bcr, rimL, oata\_2, paaK, sufS\_2, glaH, gshA\_2, gatA\_1, livK, divK, rssB, csbC\_1, kdnA, neoG, csbC\_2, xylE, ohrA, fmdA, adh, dapL, cda, srpC, desA3, cspV, mdh\_1, rcpl\_3, mmpA, lolE\_1, ldh\_2, mshA\_2, rspB, ribBA\_1, motA\_1, bcd, recF\_2, xerC\_5, xerD\_1, xerD\_2, wecD\_1, thiK\_1, desA, baeB, baeC\_1, novP, lolE\_2, intS\_1, hin\_1, intS\_2, aatB, cmk\_1, yfeW\_1, greB, rstA, rihA, yofA, nanT\_1, phnY, phnZ, gamA, asnC, asnA, dgda, cynR, cidA, glaR\_1, cspA\_2, fixL, cheB\_3, todT\_1, rhaS, serA, xerD\_3, xerD\_4, xerC\_6, pdxB\_1, ftsH4, dhpH, gshA\_3, rutB, fbiB\_1, rimJ, inhA, arnC\_1, guaD, tqsA, dhaA, dbpA\_1, cysZ, pnoA, srkA\_3, ttuB, tdh, hutG\_1, lcfB, pcpR, alr, dapE, dapD\_1, htrA\_1, pdxB\_2, pmdD, kimA, fixB, aroK\_1, proC\_2, bcsG, bcsC, gtaB\_1, bcsA, bcsB, bcsZ, thiS, moeZ, mmcO, motA\_2, xerC\_7, xerD\_5, xerD\_6, xerC\_8, xerD\_7, xerD\_8, psdht, fbiB\_2, atl, ahpD\_1, adiC, argT, cmoA, thiM, menI, aes, nanT\_2, norM, bepA\_1, ribBA\_2, fabI\_2, pgl\_1, acdA, spsI, bioF\_1, yghO, pimA, ttgF, aaeA, tagG, fcl\_2, gmd\_1, algA\_2, rfbG, rfbF, dadA\_1, pata, gmd\_2, mshA\_3, rmlC, rmlD\_2, rffH, lysA\_1, lysA\_2, mdh\_2, dprE1\_1, flhB, flhA\_1, motB\_3, lysS, tylM1, cpoB\_1, sasA\_4, mltD, farB, degQ, gabD\_1, fadA\_3, sufA, gata\_2, artp\_1, clcA\_2, ppsC, araQ, guaB\_2, fusA\_1, ttgI\_1, hchA, cvfB, ybiT, cspA\_3, csrA2, sdhE, rpoE, ybgC\_2, bamB\_1, dltA\_3, rpiB, dacB, copB, copA\_3, yvgN, fabG\_3, hutG\_2, hrp1, csd, yjiG, COQ3\_3, thi4, slrP, dadA\_2, FCS1, amiC\_2, ydjP, cpg2\_1, speE\_3, bioD1\_2, bioF\_2, pdeG, secA\_1, dacC\_1, ybeZ, sasA\_5, lapB, cmk\_2, thiK\_2, oprB, fabG\_4, lpxB, nhaP2, kynu, yybR, potE, erg, baeC\_2, hisH, hisF, kup, xerC\_9, dacC\_2, dgt, secA\_2, mtfA, sasA\_6, mmpL3, gsta, hmp\_2, menH\_4, artI, rbn\_1, alkB2, bioD1\_3, glsA1\_2, edd\_2, cca\_2, slyA\_3, besD, kata, yijE, hipA, hisC\_3, rhaR, thiD, smc\_5, sfp, csrA\_4, cpoB\_2, pal\_3, dbpA\_2, capB\_3, carA\_3, yhaJ\_2, htrA\_2, pbpE, spkD, rcsC\_4, lgrD, dprE1\_2, malt\_2, prs\_3, cadA, bamB\_2, artP\_2, argF, sspA\_2, ybaA, flp, arcB\_2, argE\_2, intS\_3, sasA\_7, csrA\_5, celA, gtaB\_2, algC\_2, wbiB, bepA\_2, galE1, ywqF, yfcJ, lrp, todT\_2, phaB\_4, caiA, rayT, aroK\_2, kdpA, kdpB\_3, kdpC, kdpD, flhA\_2, fabG\_5, ligD\_1, ligD\_2, ku, aldH1, rcsC\_5, cpg2\_2, selO, mshD\_3, sodC1, ahcY\_3, carA\_4, tetA, aroH, arnC\_2, maf, decR, iaaA, cphB, ybaL, yfeW\_2, dipZ, madD, ndh, umuC, lysP, proP\_5, dam, sauU\_3,

L. anisa  
vs  
L. pneumophila

1677  
vs  
1508

*mrgA*, *nanT*\_3, *arnT*, *ctb*, *cydB*, *hin*\_2, *dapD*\_2, *dltA*\_4, *dltC*, *fabG*\_6, *nphT7*, *acpP*\_4, *emrD*\_1, *murJ*, *cpbD*\_2, *proP*\_6, *traM*\_2, *traL*\_2, *traK*\_2, *traJ*\_2, *traI*\_2, *traG*\_2, *virB4*\_2, *csrA*\_6, *xerC*\_10, *mecI*, *thrB*, *aroK*\_3, *hss*\_2, *lpxA*, *fpr*, *emrD*\_2, *phaC*\_5, *smc*\_6, *secA*\_3, *ahpD*\_2, *ompR*, *sasA*\_8, *wecD*\_2, *hemH*\_2, *mdtC*\_1, *ppaX*, *csbC*\_3, *edd*\_3, *pgl*\_2, *stp*, *mdtA*\_5, *oprM*\_4, *tigC*, *mdtC*\_2, *rbn*\_2, *pasI*, *lpxL*, *acpP*\_5, *nudC*\_2, *fusA*\_2, *chrA*, *ykfA*\_1, *leuC*, *ybhF*, *tigI*\_2, *gpxI*, *hit*, *pepA*\_3, *frsA*, *iucD*, *glaR*\_2, *tmoT*, *sasA*\_9, *yecN*, *perI*, *speE*\_4, *budB*, *gabD*\_2, *ykfA*\_2, *ackA*\_2, *fabI*\_3, *yacG*, *cpdA*\_3, *nhaK*, *srfAB*

***L. pneumophila* SG1 genes not found in *L. anisa*:** *recF*, *resA*, *hap*\_1, *cat*, *yhaJ*, *merR*, *aroH*\_1, *ddl*\_1, *ydeN*, *msrA*\_1, *ynjF*\_1, *cdgJ*, *gapA*, *yedI*, *cynR*\_1, *mhpA*, *pbuE*, *ddaF*, *rbsB*, *frsA*, *rbsC*, *dapE*\_1, *yfdE*, *katG2*, *cydB*\_1, *pknD*, *phrA*, *lrgA*, *cynR*\_2, *purK*, *purE*, *ndhB*, *lagD*, *mdlC*, *sidE*, *bpoC*, *yhhQ*, *tigC*\_1, *yfbR*, *fosA*, *secE*, *fusA*, *lpxL*\_1, *gshA*, *ddl*\_2, *ogt*, *nagB*, *edd*, *csbC*, *hemH*, *csfD*, *tigC*\_2, *cfiA*, *dmpP*, *artJ*\_3, *argI*, *cdsA*, *lpxA*\_1, *yfbE*, *plsC*, *pabC*, *ydjZ*, *sufS*, *arnT*\_1, *nanT*, *dam*\_1, *ybhF*\_1, *ybhR*\_1, *norW*, *artJ*\_4, *ybhF*\_2, *ybhR*\_2, *gsiA*, *ankX*, *tdh*\_1, *hutG*, *pdaC*, *cusS*, *czcR*, *alr-1*, *hisF*\_1, *hisH*\_1, *neuA*, *neuB*\_1, *rfbC*, *rmlD*, *rmlA*, *rfbB*, *tagO*, *neuB*\_2, *kpsM*, *wbbL*, *blh*, *patA*\_1, *rsbV*, *ybgI*, *lolC*, *macA*, *lapB*\_1, *dapE*\_2, *dapD*, *yihG*, *yrbG*, *htrA*, *pdxB*, *etfA*, *aroK*, *korB*, *csrA2*\_1, *cadA*\_1, *cadA*\_2, *cusB*\_1, *cusA*\_1, *hmp*, *intS*, *yhcG*\_1, *murJ*\_1, *tam*\_3, *yqaB*, *cusB*\_2, *cusA*\_2, *msrB*\_1, *kaiB*, *kaiC*, *mltD*\_1, *fliY*, *artJ*\_5, *guaD*\_1, *potD*, *potB*, *potA*, *ousA*, *argE*, *cutD*, *zraR*, *bphD*, *bepA*, *ribBA*, *kup*\_1, *hisF*\_2, *hisH*\_2, *cydB*\_2, *proX*, *slyA*, *yhcG*\_2, *Int-Tn*, *yedK*, *umuC*\_1, *vsr*, *recD2*, *virB9*, *virB4*, *csrA2*\_2, *qseC*, *mltD*\_2, *yejM*, *spnN*, *degP*, *gabD*, *gspH*, *lpxB*\_1, *calB*, *yedF*\_1, *arnC*, *arnT*\_2, *thiK*, *udp*, *cmk*, *lapB*\_2, *cpxA*, *yrciV*, *secA*, *zapD*, *bioF*, *bioD*, *decR*\_1, *dacC*, *dat*, *apxIB*, *hepA*, *hlyD*, *yddE*, *bamB*, *lapB*\_3, *artJ*\_6, *sthA*\_1, *moeZ*\_1, *ybgC*, *algU*, *yfiC*\_1, *blaI*, *mneA*, *thrC*, *galP*, *empA*, *desG*, *glgE*, *ung*, *umuC*\_2, *cpg2*, *guaB*, *lacG*, *tdh*\_2, *clcA*, *gatA*, *iscA*, *lysU*, *flhA*, *flhB*\_1, *fliP*, *dprE1*, *argP*, *lysA*, *garP*, *acdA*\_1, *gmhB*, *moeZ*\_2, *udk*\_3, *fabI*, *clsB*, *lgoT*, *clcB*, *tgpA*, *gstB*, *pilE1*\_1, *pilE1*\_2, *gadC*\_4, *hipA*\_1, *yfiC*\_2, *pksJ*, *acrC*, *mmgB*, *dltC*\_1, *cypB*, *yxaF*, *yhbO*, *setA*, *guaD*\_2, *proC*, *aroH*\_2, *yceF*, *cpoB*, *atm1*\_1, *atm1*\_2, *dkgA*, *mazG*, *dam*\_2, *traN*, *traC*, *traV*, *msrA*\_2, *msrB*\_2, *ynjF*\_2, *sthA*\_2, *msrAB*, *dbpA*, *kup*\_2, *czcA*\_3, *czcC*\_3, *pcpR*\_1, *aadK*, *atm1*\_3, *sdeA*\_1, *sidJ*\_1, *sdeA*\_2, *ycgJ*, *rhaS*\_1, *oqxBI3*, *dltA*, *tam*\_4, *cynT*, *dtpA*\_5, *patA*\_2, *chiA*, *esiB*\_4, *dltC*\_2, *fabH*\_3, *bcx*\_1, *dhaT*, *ackA*, *addB*, *ldh*, *lolE*, *azoR1*, *motA*, *tam*\_5, *dagK*, *sodC*, *ahpD*, *mdh*, *nudE*, *aam*, *hipA*\_2, *leuO*, *mgtA*, *dmlR*\_3, *kup*\_3, *katG1*, *pcpR*\_2, *fenF*, *bcx*\_2, *elaA*, *rcp1*, *drrA*, *sidD*, *hoxH*, *asrB*, *ndhI*, *hypE*, *hypD*, *hypC*, *hypF*, *hypB*, *nixA*, *algC*, *kynB*, *hss*, *cqsS*\_1, *sidJ*\_2, *decR*\_2, *aspC*, *glbN*, *gcoB*, *rhaS*\_2, *lexA*\_5, *hin*, *acdA*\_2, *flhB*\_2, *vanX*, *dprA*, *murJ*\_2, *cfiB*, *yhcR*, *ghrB*, *leuB*, *tam*\_6, *sspA*, *egtC*\_3, *aseR*, *cqsA*, *cqsS*\_2, *czcD*, *cca*, *APOA1BP*, *csfE*, *lubX*, *tpm*, *mdtL*\_3, *guaC*, *nylA*, *ravA*, *yedF*\_2, *fadM*, *algA*, *soj*, *hcaC*, *mshA*, *msrA*\_3, *panD*, *lpxL*\_2, *lpxL*\_3, *lpxD*\_3, *lpxB*\_2, *btuD*\_3, *asnO*, *cbs*, *rbn*, *hap*\_2, *alkB1*

**Table S5.** List of virulence genes shared among the *Legionella* species belonging to the same clade: 8cVS16<sup>T</sup>, 9fVS26, *Legionella anisa* WA-316-C3 ATCC35292<sup>T</sup>, *Legionella bozeman* WIGA ATCC 33217<sup>T</sup>, *Legionella parisiensis* PF-209C-C2 ATCC35299<sup>T</sup>, *Legionella tusconensis* 1087AZH ATCC49180<sup>T</sup>, *Legionella wadsworthii* 81-716A ATCC 33877<sup>T</sup>. All species show blue-white autofluorescence.

|                |                                                                                                                                                                                                                                                                                                                                                                                                                                                                                                                                                                                                                                                                                                                                                                                                                                                                         |
|----------------|-------------------------------------------------------------------------------------------------------------------------------------------------------------------------------------------------------------------------------------------------------------------------------------------------------------------------------------------------------------------------------------------------------------------------------------------------------------------------------------------------------------------------------------------------------------------------------------------------------------------------------------------------------------------------------------------------------------------------------------------------------------------------------------------------------------------------------------------------------------------------|
| Present genes* | <i>htpB</i> , <i>pilB</i> , <i>pilC</i> , <i>pilD</i> , <i>pilE</i> , <i>pilM</i> , <i>pilN</i> , <i>pilO</i> , <i>pilP</i> , <i>pilQ</i> , <i>mip</i> , <i>enhA</i> , <i>ccmA</i> , <i>ccmC</i> , <i>ccmD</i> , <i>ccmE</i> , <i>ccmF</i> , <i>feoB</i> , <i>frgA</i> , <i>iraA</i> , <i>iraB</i> , <i>lbtB</i> , <i>rpoS</i> , <i>csrA</i> , <i>letS</i> , <i>relA</i> , <i>dotA</i> , <i>dotB</i> , <i>dotC</i> , <i>dotD</i> , <i>icmB/dotO</i> , <i>icmC/dotE</i> , <i>icmD/dotP</i> , <i>icmE/dotG</i> , <i>icmF</i> , <i>icmG/dotF</i> , <i>icmH/dotU</i> , <i>icmJ/dotN</i> , <i>icmK/dotH</i> , <i>icmL/dotI</i> , <i>icmN/dotK</i> , <i>icmO/dotL</i> , <i>icmP/dotM</i> , <i>icmQ</i> , <i>icmS</i> , <i>icmV</i> , <i>icmW</i> , <i>icmX</i> , <i>lvgA</i> , <i>lspC</i> , <i>lspD</i> , <i>lspE</i> , <i>lspF</i> , <i>lspG</i> , <i>lspH</i> , <i>lsp</i> |
|                | <i>lidL</i> , <i>drrA/sidM</i> , <i>laiE</i> , <i>lepA</i> , <i>lidA</i> , <i>ralF</i> , <i>sdbA</i> , <i>sdbB-like</i> , <i>sdbB</i> , <i>sdbC</i> , <i>sdcA</i> , <i>sdeA/laiA</i> , <i>sdeB/laiB</i> , <i>sdeC/laiC</i> , <i>sdeD/laiF</i> , <i>sdhA</i> , <i>lvhB7</i> , <i>lvhB5</i> , <i>lvhB3</i> , <i>icmR</i> , <i>lbtA</i> , <i>sidA</i> , <i>sidB</i> , <i>sicC</i> , <i>sidD</i> , <i>sidE-like</i> , <i>sidE/laiD</i> , <i>sidF</i> , <i>sidG</i> , <i>sidH</i> , <i>vipA</i> , <i>vipD1</i> , <i>vipD2</i> , <i>vipD3</i> , <i>vipE</i> , <i>wipB</i> , <i>wipC</i> , <i>ylfB</i> , <i>rtxA</i>                                                                                                                                                                                                                                                           |

\* *wcbB* gene is present only in 8cVS16<sup>T</sup> and 9fVS26 isolates.
